# Supplementary material for: Synthesis of 4-benzylpyridines via Pd-catalyzed CH3-arylation of 4-picoline
Source: Royal Society of Chemistry journal article supplement (doi:10.1039/c7ob01726j), 2017-01-01

# Synthesis of 4-benzylpyridines via Pd-catalyzed CH<sub>3</sub>-arylation of 4-picoline

Jing Wu,<sup>a,b</sup> Dadian Wang,<sup>a</sup> Xiang Chen,<sup>a</sup> Qingwen Gui,<sup>a</sup> Hua Li,<sup>b</sup> Ze Tan,<sup>\*a</sup>  
Genping Huang<sup>\*b</sup> and Guangwei Wang<sup>\*b</sup>

<sup>a</sup> State Key Laboratory of Chemo/Biosensing and Chemometrics, College of Chemistry and Chemical Engineering, Hunan University, Changsha 410082, P. R. China

<sup>b</sup> Department of Chemistry, Collaborative Innovation Center of Chemical Science and Engineering, Tianjin University, Tianjin 300072, P. R. China

## Supporting Information

### Table of contents

#### 1. General information

#### 2. Pd-catalyzed arylation of 4-methylpyridine

##### 2.1 Optimization of reaction conditions

##### 2.2 General procedure for Pd-catalyzed arylation of 4-methylpyridine

##### 2.3 Reaction of coupling 4-picoline with 1-chloro-4-(trifluoromethyl)benzene

##### 2.4 Control experiments

##### 2.5 Synthesis of 1,3,5-tris(pyridin-4-ylmethyl)benzene

#### 3. Characterization data of products

## 1. General information

$^1\text{H}$  NMR,  $^{13}\text{C}$  NMR and  $^{19}\text{F}$  NMR were recorded in  $\text{CDCl}_3$  at room temperature on the Bruker AVIII-400 spectrometer (400 MHz,  $^1\text{H}$ ). The chemical-shifts scale is based on internal TMS. The peak patterns are indicated as follows: s, singlet; d, doublet; t, triplet; q, quartet; m, multiplet; qui, quintet; sxt, sextet. The coupling constants,  $J$  are reported in Hertz (Hz). High-resolution mass spectral (HRMS) analyses were carried out using a TOF MS instrument with an ESI source.

Unless otherwise noted, all reagents were obtained from commercial suppliers and used without further purification, all reactions were run under  $\text{N}_2$  and were heated in the oil bath, Fresh catalyst  $\text{Pd}(\text{PPh}_3)_4$  were used in all experiments. Prior to starting experiments, the reaction flask must be heated by using heat gun in vacuum, then the base  $\text{Cs}_2\text{CO}_3$  must be heated by using heat gun as well. Products were purified by flash column chromatography on 200-300 mesh silica gel,  $\text{SiO}_2$ .

## 2. Pd-catalyzed arylation of 4-methylpyridine

### 2.1 Optimization of reaction conditions

Table 1. Screening of reaction solvents<sup>a</sup>

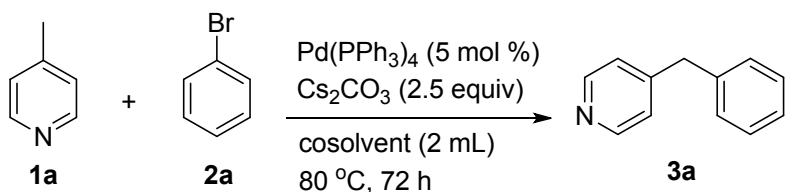

| entry | cosolvent               | Yield (%) <sup>b</sup> |
|-------|-------------------------|------------------------|
| 1     | 4-picoline <sup>c</sup> | 86                     |
| 2     | DMF                     | 14                     |
| 3     | DMSO                    | 6                      |
| 4     | Dioxane                 | 0                      |
| 5     | DMI                     | 0                      |
| 6     | NMP                     | 0                      |
| 7     | toluene                 | 10                     |
| 8     | THF                     | 0                      |

<sup>a</sup>Reaction conditions: **1a** (5.0 mmol), **2a** (0.5 mmol),  $\text{Pd}(\text{PPh}_3)_4$  (0.025 mmol),  $\text{Cs}_2\text{CO}_3$  (1.25 mmol), cosolvent (2.0 mL), under 80 °C, 72 h. <sup>b</sup>Isolated yields.

<sup>c</sup>Reaction conditions: **1a** (3.0 mL), **2a** (0.5 mmol),  $\text{Pd}(\text{PPh}_3)_4$  (0.025 mmol),  $\text{Cs}_2\text{CO}_3$  (1.25 mmol), under 80 °C, 72 h.

## 2.2 General procedure for Pd-catalyzed arylation of 4-methylpyridine

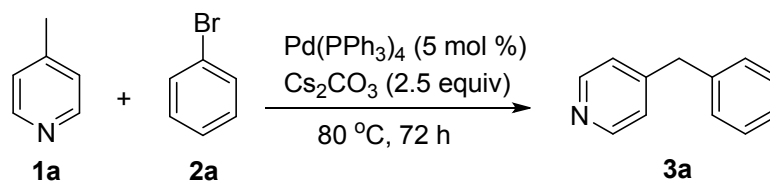

To a dried 25 mL sealed tube, were added the base Cs<sub>2</sub>CO<sub>3</sub> (407 mg, 1.25 mmol), then it must be heated by using heat gun in vacuum. And **2a** (78.5 mg, 0.5 mmol), **1a** (3 mL), Pd(PPh<sub>3</sub>)<sub>4</sub> (29 mg, 0.025 mol) were added in the tube when it changed room temperature. The tube was capped and stirred at 80 °C for 72 h. The reaction mixture was cooled to room temperature and quenched with water. It was extracted 3 times by using EtOAc, the organic phase was combined and dried with Mg<sub>2</sub>SO<sub>4</sub>, then concentrated. The resulting residue was purified by chromatography on silica gel (petroleum ether/triethylamine = 20: 1) to give the pure compound **3a**.

## 2.3 Reaction of coupling 4-picoline with 1-chloro-4-(trifluoromethyl)benzene

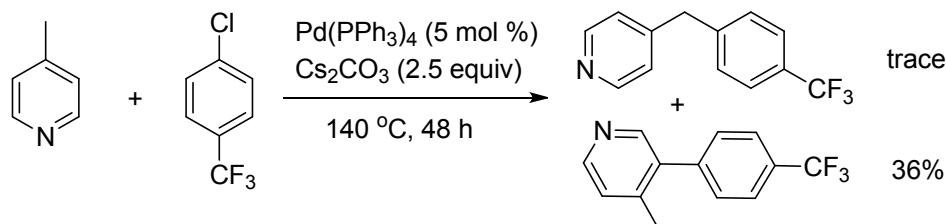

To a dried 25 mL sealed tube, were added the base Cs<sub>2</sub>CO<sub>3</sub> (407 mg, 1.25 mmol), then it must be heated by using heat gun in vacuum. And 1-chloro-4-(trifluoromethyl)benzene (90 mg, 0.5 mmol), 4-picoline (3 mL), Pd(PPh<sub>3</sub>)<sub>4</sub> (29 mg, 0.025 mol) were added in the tube when it changed room temperature. The tube was capped and stirred at 140 °C for 48 h. The reaction mixture was cooled to room temperature and quenched with water. Then it was extracted 3 times by using EtOAc, the organic phase was combined and dried with Mg<sub>2</sub>SO<sub>4</sub>, then concentrated. The resulting residue was purified by chromatography on silica gel (petroleum ether/triethylamine = 20: 1) to give the pure compound 4-methyl-3-(4-(trifluoromethyl)phenyl)pyridine. 4-methyl-3-(4-(trifluoromethyl)phenyl)pyridine<sup>1</sup>: 42 mg, 36% yield, colorless oil; <sup>1</sup>H NMR (400 MHz, CDCl<sub>3</sub>): δ 8.41 (d, *J* = 5.0 Hz, 1H), 8.35 (s, 1H), 7.64 (d, *J* = 8.0 Hz, 2H), 7.37 (d, *J* = 8.0 Hz, 2H), 7.14 (d, *J* = 5.0 Hz, 1H).

## 2.4 Control experiments

To two dried 25 mL sealed tubes, were added respectively the base Cs<sub>2</sub>CO<sub>3</sub> (407 mg, 1.25 mmol),

then they must be heated by using heat gun in vacuum. After cooling down to rt, bromobenzene (78.5 mg, 0.5 mmol), **1a** (1.5 mL, 15.4 mmol) or **1a-d<sub>5</sub>** (1.5 mL, 15.4 mmol), Pd(PPh<sub>3</sub>)<sub>4</sub> (29 mg, 0.025 mol) were added in the tubes. The tubes were capped and stirred at 80 °C for 72 h. The two reaction mixtures were cooled to room temperature, combined and quenched with water. The mixture was extracted 3 times by using EtOAc, the organic phase was combined and dried with Mg<sub>2</sub>SO<sub>4</sub>, then concentrated. The resulting residue was purified by chromatography on silica gel (petroleum ether/triethylamine = 20:1) to give the product **3a** and **3a-d<sub>4</sub>** in less than 50% yield. <sup>1</sup>H NMR (400 MHz, CDCl<sub>3</sub>): δ 8.41 (d, *J* = 5.0 Hz, 2H), 7.24 (t, *J* = 7.0 Hz, 3.47H), 7.17 (d, *J* = 6.4 Hz, 1.74H), 7.10 (d, *J* = 7.1 Hz, 3.30H), 7.03 (s, 3.47H), 3.89 (s, 2.29H). The KIE value was calculated as *k<sub>H</sub>*/*k<sub>D</sub>* = 1.45.

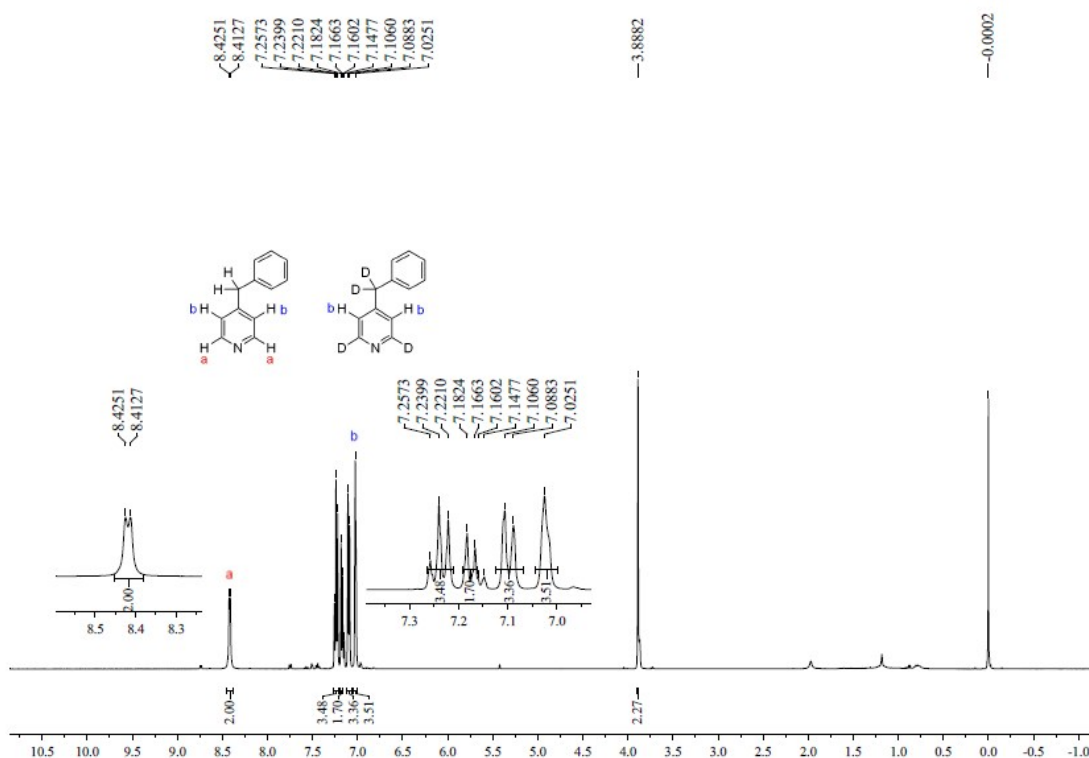

## 2.5 Synthesis of 1,3,5-tris(pyridin-4-ylmethyl)benzene

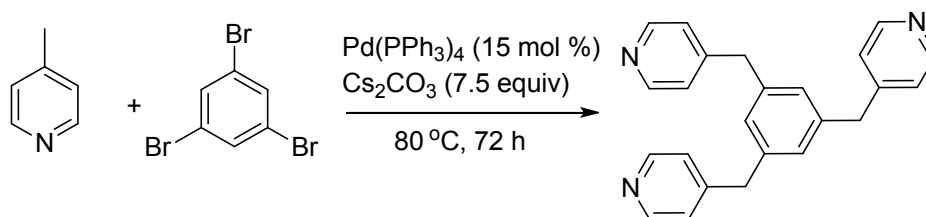

To a dried 25 mL sealed tube, were added the base Cs<sub>2</sub>CO<sub>3</sub> (1.222g, 3.75 mmol), then it must be heated by using heat gun in vacuum. And 1,3,5-tribromobenzene (155.5mg, 0.5 mmol), 4-pyridylmethyl

(3 mL), Pd(PPh<sub>3</sub>)<sub>4</sub> (87 mg, 0.075 mmol) were added in the tube when it changed room temperature. The tube was capped and stirred at 80 °C for 72 h. The reaction mixture was cooled to room temperature, and was extracted 3 times by using EtOAc, the organic phase was combined and dried with Mg<sub>2</sub>SO<sub>4</sub>, then concentrated. The resulting residue was purified by chromatography on silica gel (petroleum ether/triethylamine = 15: 1) to give the desired product. 1,3,5-tris(pyridin-4-ylmethyl)benzene Synthesis<sup>2</sup>: 70 mg, 40% yield, white solid, mp: 102–106 °C; <sup>1</sup>H NMR (400 MHz, CDCl<sub>3</sub>): δ 8.42 (d, *J* = 5.8 Hz, 6H), 6.98 (d, *J* = 5.7 Hz, 6H), 6.79 (s, 3H), 3.83 (s, 6H); <sup>13</sup>C NMR (100 MHz, CDCl<sub>3</sub>): δ 148.91, 148.54, 138.93, 127.11, 123.07, 39.97; HRMS (ESI) calcd for C<sub>24</sub>H<sub>21</sub>N<sub>3</sub> (M + H)<sup>+</sup> 352.1815, found 352.1806.

### 3. Characterization data of products

#### 4-benzylpyridine (3a)<sup>3</sup>

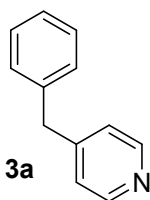

*Compound 3a*: 72 mg, 86% yield, colorless oil; <sup>1</sup>H NMR (400 MHz, CDCl<sub>3</sub>): δ 8.42 (d, *J* = 6.0 Hz, 2H), 7.23 (t, *J* = 7.5 Hz, 2H), 7.17 (d, *J* = 6.7 Hz, 1H), 7.09 (d, *J* = 7.2 Hz, 2H), 7.02 (d, *J* = 5.8 Hz, 2H), 3.88 (s, 2H); <sup>13</sup>C NMR (100 MHz, CDCl<sub>3</sub>): δ 148.95, 148.81, 137.85, 128.01, 127.70, 125.65, 123.14, 40.21.

#### 4-(4-methylbenzyl)pyridine (3aa)<sup>4</sup>

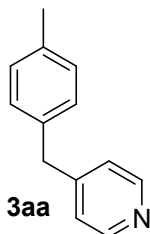

*Compound 3aa*: 67 mg, 74% yield, colorless oil; <sup>1</sup>H NMR (400 MHz, CDCl<sub>3</sub>): δ 8.48 (d, *J* = 5.8 Hz, 2H), 7.09 (m, 6H), 3.92 (s, 2H); <sup>13</sup>C NMR (100 MHz, CDCl<sub>3</sub>): δ 149.29, 148.78, 135.23, 134.79, 128.37, 127.88, 123.11, 39.79, 20.00; HRMS (ESI) calcd for C<sub>13</sub>H<sub>13</sub>N (M + H)<sup>+</sup> 184.1128, found 184.1117.

#### 4-(3-methylbenzyl)pyridine (3ab)<sup>5</sup>

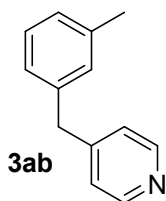

*Compound 3ab*: 67 mg, 74% yield, colorless oil; <sup>1</sup>H NMR (400 MHz, CDCl<sub>3</sub>): δ 8.39 (d, *J* = 5.9 Hz, 2H), 7.10 (t, *J* = 7.5 Hz, 1H), 6.99 (d, *J* = 5.7 Hz, 2H), 6.95 (d, *J* = 7.5 Hz, 1H), 6.87 (d, *J* = 8.2 Hz, 2H), 3.81 (s, 2H), 2.22 (s, 3H); <sup>13</sup>C NMR (100 MHz, CDCl<sub>3</sub>): δ 149.07, 148.78, 137.75, 137.31, 128.75, 127.56, 126.36, 125.02, 123.13, 40.13, 20.32; HRMS (ESI) calcd for C<sub>13</sub>H<sub>13</sub>N (M + H)<sup>+</sup> 184.1128, found 184.1128.

#### 4-(3-methoxybenzyl)pyridine (3ac)<sup>6</sup>

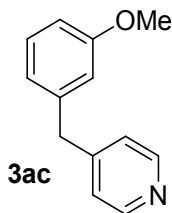

**Compound 3ac:** 69 mg, 70% yield, colorless oil;  $^1\text{H NMR}$  (400 MHz,  $\text{CDCl}_3$ ):  $\delta$  8.40 (d,  $J = 5.9$  Hz, 2H), 7.14 (t,  $J = 8.0$  Hz, 1H), 7.01 (d,  $J = 5.7$  Hz, 2H), 6.69 (t,  $J = 7.5$  Hz, 2H), 6.62 (s, 1H), 3.84 (s, 2H), 3.68 (s, 3H);  $^{13}\text{C NMR}$  (100 MHz,  $\text{CDCl}_3$ ):  $\delta$  158.84, 148.82, 148.78, 139.36, 128.68, 123.12, 120.38, 113.93, 110.78, 54.13, 40.19; HRMS (ESI) calcd for  $\text{C}_{13}\text{H}_{13}\text{NO}$  ( $\text{M} + \text{H}$ ) $^+$  200.1077, found 200.1073.

#### 4-(4-methoxybenzyl)pyridine (3ad)<sup>5</sup>

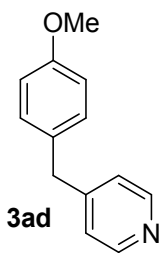

**Compound 3ad:** 66 mg, 67% yield, colorless oil;  $^1\text{H NMR}$  (400 MHz,  $\text{CDCl}_3$ ):  $\delta$  8.41 (d,  $J = 5.7$  Hz, 2H), 7.02 (m, 4H), 6.78 (d,  $J = 8.6$  Hz, 2H), 3.83 (s, 2H), 3.72 (s, 3H);  $^{13}\text{C NMR}$  (100 MHz,  $\text{CDCl}_3$ ):  $\delta$  157.38, 149.45, 148.82, 129.92, 123.05, 113.12, 54.26, 39.34; HRMS (ESI) calcd for  $\text{C}_{13}\text{H}_{13}\text{NO}$  ( $\text{M} + \text{H}$ ) $^+$  200.1077, found 200.1078.

#### 4-(benzo[d][1,3]dioxol-5-ylmethyl)pyridine (3ae)<sup>5</sup>

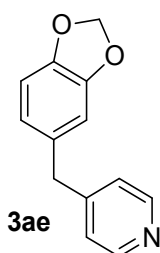

**Compound 3ae:** 76 mg, 72% yield, colorless oil;  $^1\text{H NMR}$  (400 MHz,  $\text{CDCl}_3$ ):  $\delta$  8.42 (d,  $J = 5.8$  Hz, 2H), 7.02 (d,  $J = 5.5$  Hz, 2H), 6.69 (d,  $J = 7.7$  Hz, 1H), 6.57 (d,  $J = 8.8$  Hz, 2H), 5.86 (s, 2H), 3.80 (s, 2H);  $^{13}\text{C NMR}$  (100 MHz,  $\text{CDCl}_3$ ):  $\delta$  149.12, 148.85, 146.92, 145.33, 131.57, 123.00, 121.00, 108.39, 107.37, 99.99, 39.88; HRMS (ESI) calcd for  $\text{C}_{13}\text{H}_{11}\text{NO}_2$  ( $\text{M} + \text{H}$ ) $^+$  214.0870, found 214.0869.

#### 4-([1,1'-biphenyl]-4-ylmethyl)pyridine (3af)<sup>5</sup>

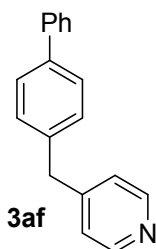

**Compound 3af:** 87 mg, 71% yield, white solid, mp: 68–70 °C;  $^1\text{H NMR}$  (400 MHz,  $\text{CDCl}_3$ ):  $\delta$  8.43 (d,  $J = 5.8$  Hz, 2H), 7.47 (m, 4H), 7.34 (t,  $J = 7.8$  Hz, 2H), 7.25 (d,  $J = 7.4$  Hz, 1H), 7.15 (d,  $J = 8.0$  Hz, 2H), 7.05 (d,  $J = 5.6$  Hz, 2H), 3.90 (s, 2H);  $^{13}\text{C NMR}$  (100 MHz,  $\text{CDCl}_3$ ):  $\delta$  148.88, 148.85, 139.67, 138.64, 136.90, 128.41, 127.75, 126.41, 126.25, 125.98, 123.16, 39.84; HRMS (ESI) calcd for  $\text{C}_{18}\text{H}_{15}\text{N}$  ( $\text{M} + \text{H}$ ) $^+$  246.1284, found 246.1278

#### N,N-dimethyl-4-(pyridin-4-ylmethyl)aniline (3ag)<sup>5</sup>

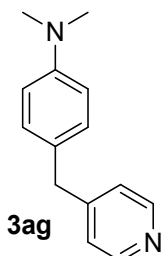

**Compound 3ag:** 18 mg, 17% yield, white solid, mp: 42–43 °C;  $^1\text{H NMR}$  (400 MHz,  $\text{CDCl}_3$ ):  $\delta$  8.40 (d,  $J = 5.8$  Hz, 2H), 7.02 (d,  $J = 5.6$  Hz, 2H), 6.96 (d,  $J = 8.6$  Hz, 2H), 6.62 (d,  $J = 8.6$  Hz, 2H), 3.79 (s, 2H), 2.85 (s, 6H);  $^{13}\text{C NMR}$

(100 MHz, CDCl<sub>3</sub>):  $\delta$  150.04, 148.70, 148.44, 128.66, 125.70, 123.07, 111.88, 39.55, 39.26; HRMS (ESI) calcd for C<sub>14</sub>H<sub>16</sub>N<sub>2</sub> (M + H)<sup>+</sup> 213.1393, found 213.1392.

#### 4-(4-chlorobenzyl)pyridine (**3ah**)<sup>7</sup>

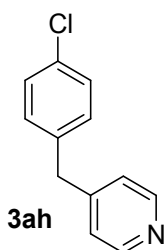

*Compound 3ah*: 75 mg, 75% yield, colorless oil; <sup>1</sup>H NMR (400 MHz, CDCl<sub>3</sub>):  $\delta$  8.42 (dd,  $J$  = 6.0, 3.0 Hz, 2H), 7.19 (m, 2H), 7.00 (m, 4H), 3.84 (s, 2H); <sup>13</sup>C NMR (100 MHz, CDCl<sub>3</sub>):  $\delta$  148.94, 148.33, 136.29, 131.54, 129.33, 127.82, 123.03, 39.47; HRMS (ESI) calcd for C<sub>12</sub>H<sub>10</sub>ClN (M + H)<sup>+</sup> 204.0582, found 204.0581.

#### 4-(4-fluorobenzyl)pyridine (**3ai**)<sup>8</sup>

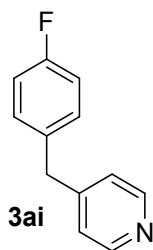

*Compound 3ai*: 71 mg, 76% yield, colorless oil; <sup>1</sup>H NMR (400 MHz, CDCl<sub>3</sub>):  $\delta$  8.42 (d,  $J$  = 5.9 Hz, 2H), 7.05 (m, 2H), 7.00 (d,  $J$  = 5.7 Hz, 2H), 6.92 (t,  $J$  = 8.6 Hz, 2H), 3.86 (s, 2H); <sup>13</sup>C NMR (100 MHz, CDCl<sub>3</sub>):  $\delta$  148.93, 148.74, 133.52 (d,  $J$  = 3.4 Hz), 129.46 (d,  $J$  = 10.2 Hz), 123.02, 114.65, 114.44, 39.35; <sup>19</sup>F NMR (375 MHz, CDCl<sub>3</sub>):  $\delta$  -116.24; HRMS (ESI) calcd for C<sub>12</sub>H<sub>10</sub>FN (M + H)<sup>+</sup> 188.0877, found 188.0874.

#### ethyl 4-(pyridin-4-ylmethyl)benzoate (**3aj**)<sup>5</sup>

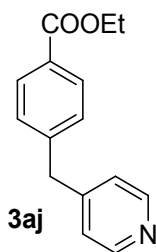

*Compound 3aj*: 80 mg, 67% yield, colorless oil; <sup>1</sup>H NMR (400 MHz, CDCl<sub>3</sub>):  $\delta$  8.43 (d,  $J$  = 5.9 Hz, 2H), 7.91 (d,  $J$  = 8.2 Hz, 2H), 7.16 (d,  $J$  = 8.0 Hz, 2H), 7.00 (d,  $J$  = 5.9 Hz, 2H), 4.29 (q,  $J$  = 7.1 Hz, 2H), 3.93 (s, 2H), 1.30 (t,  $J$  = 7.1 Hz, 3H); <sup>13</sup>C NMR (100 MHz, CDCl<sub>3</sub>):  $\delta$  165.30, 148.98, 147.98, 142.97, 128.98, 128.05, 128.00, 123.10, 59.91, 40.11, 13.30; HRMS (ESI) calcd for C<sub>15</sub>H<sub>15</sub>NO<sub>2</sub> (M + H)<sup>+</sup> 242.1183, found 242.1179.

#### 4-(pyridin-4-ylmethyl)benzotrile (**3ak**)<sup>5</sup>

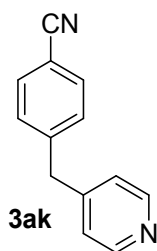

*Compound 3ak*: 73 mg, 76% yield, colorless oil; <sup>1</sup>H NMR (400 MHz, CDCl<sub>3</sub>):  $\delta$  8.45 (d,  $J$  = 5.8 Hz, 2H), 7.53 (d,  $J$  = 8.2 Hz, 2H), 7.21 (d,  $J$  = 8.0 Hz, 2H), 7.01 (d,  $J$  = 5.6 Hz, 2H), 3.95 (s, 2H); <sup>13</sup>C NMR (100 MHz, CDCl<sub>3</sub>):  $\delta$  149.16, 147.12, 143.35, 131.53, 128.77, 123.09, 117.64, 109.79, 40.17; HRMS (ESI) calcd for C<sub>13</sub>H<sub>10</sub>N<sub>2</sub> (M + H)<sup>+</sup> 195.0924, found 195.0918.

#### 4-(3-(trifluoromethyl)benzyl)pyridine (**3al**)<sup>5</sup>

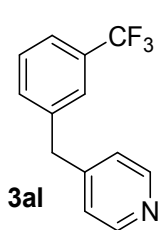

**Compound 3al:** 104 mg, 88% yield, colorless oil;  $^1\text{H}$  NMR (400 MHz,  $\text{CDCl}_3$ ):  $\delta$  8.44 (d,  $J = 5.8$  Hz, 2H), 7.43 (d,  $J = 7.6$  Hz, 2H), 7.36 (m, 2H), 7.26 (d,  $J = 7.6$  Hz, 1H), 7.01 (d,  $J = 5.6$  Hz, 2H), 3.93 (s, 2H);  $^{13}\text{C}$  NMR (100 MHz,  $\text{CDCl}_3$ ):  $\delta$  149.06, 147.81, 138.78, 131.39, 130.09 (q,  $J = 32.1$  Hz), 128.20, 124.68 (q,  $J = 3.76$  Hz), 123.06, 123.01 (d,  $J = 270.73$  Hz), 122.63 (q,  $J = 3.73$  Hz), 39.90;  $^{19}\text{F}$  NMR (375 MHz,  $\text{CDCl}_3$ ):  $\delta$  -62.63; HRMS (ESI) calcd for  $\text{C}_{13}\text{H}_{10}\text{F}_3\text{N}$  ( $\text{M} + \text{H}$ ) $^+$  238.0845, found 238.0847.

#### 4-(4-(trifluoromethyl)benzyl)pyridine (3am)

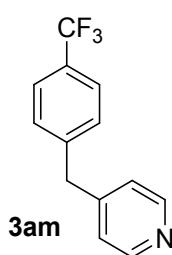

**Compound 3am:** 97 mg, 82% yield, colorless oil;  $^1\text{H}$  NMR (400 MHz,  $\text{CDCl}_3$ ):  $\delta$  8.45 (d,  $J = 5.9$  Hz, 2H), 7.49 (d,  $J = 8.0$  Hz, 2H), 7.21 (d,  $J = 8.0$  Hz, 2H), 7.01 (d,  $J = 5.7$  Hz, 2H), 3.94 (s, 2H);  $^{13}\text{C}$  NMR (100 MHz,  $\text{CDCl}_3$ ):  $\delta$  149.07, 147.75, 141.91, 128.34, 128.30 (d,  $J = 65.9$  Hz), 126.67 (q,  $J = 3.77$  Hz), 123.12 (d,  $J = 270.2$  Hz), 123.09, 39.94;  $^{19}\text{F}$  NMR (375 MHz,  $\text{CDCl}_3$ ):  $\delta$  -62.48; HRMS (ESI) calcd for  $\text{C}_{13}\text{H}_{10}\text{F}_3\text{N}$  ( $\text{M} + \text{H}$ ) $^+$  238.0845, found 238.0847.

#### 4-(2-methylbenzyl)pyridine (3an)<sup>7</sup>

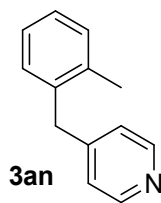

**Compound 3an:** 32 mg, 35% yield, colorless oil;  $^1\text{H}$  NMR (400 MHz,  $\text{CDCl}_3$ ):  $\delta$  8.40 (dd,  $J = 6.0, 3.0$  Hz, 2H), 7.11 (m, 3H), 7.04 (m, 1H), 6.97 (d,  $J = 6.0$  Hz, 2H), 3.91 (s, 2H), 2.13 (s, 3H);  $^{13}\text{C}$  NMR (100 MHz,  $\text{CDCl}_3$ ):  $\delta$  148.76, 148.54, 135.73, 135.62, 129.53, 129.09, 126.08, 125.23, 122.95, 37.85, 18.57; HRMS (ESI) calcd for  $\text{C}_{13}\text{H}_{13}\text{N}$  ( $\text{M} + \text{H}$ ) $^+$  184.1128, found 184.1121.

#### 4-(2,5-dimethylbenzyl)pyridine (3ao)

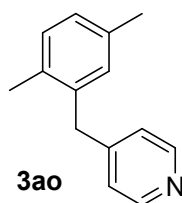

**Compound 3ao:** 41 mg, 43% yield, colorless oil;  $^1\text{H}$  NMR (400 MHz,  $\text{CDCl}_3$ ):  $\delta$  8.40 (d,  $J = 5.8$  Hz, 2H), 7.00 (d,  $J = 7.6$  Hz, 1H), 6.97 (d,  $J = 5.5$  Hz, 2H), 6.93 (d,  $J = 8.0$  Hz, 1H), 6.85 (s, 1H), 3.86 (s, 2H), 2.23 (s, 3H), 2.08 (s, 3H);  $^{13}\text{C}$  NMR (100 MHz,  $\text{CDCl}_3$ ):  $\delta$  148.77, 148.68, 135.53, 134.69, 132.40, 129.86, 129.43, 126.71, 122.96, 37.83, 19.90, 19.08; HRMS (ESI) calcd for  $\text{C}_{14}\text{H}_{15}\text{N}$  ( $\text{M} + \text{H}$ ) $^+$  198.1284, found 198.1270.

#### 4-(2-methoxybenzyl)pyridine (3ap)



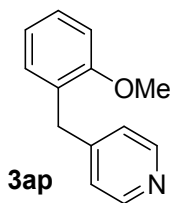

**Compound 3ap:** 49 mg, 50% yield, colorless oil;  $^1\text{H NMR}$  (400 MHz,  $\text{CDCl}_3$ ):  $\delta$  8.38 (d,  $J = 5.9$  Hz, 2H), 7.16 (m, 1H), 7.03 (d,  $J = 5.9$  Hz, 3H), 6.83 (m, 2H), 3.88 (s, 2H), 3.71 (s, 3H);  $^{13}\text{C NMR}$  (100 MHz,  $\text{CDCl}_3$ ):  $\delta$  156.34, 149.18, 148.58, 129.49, 127.13, 126.42, 123.11, 119.59, 109.56, 54.27, 34.57; HRMS (ESI) calcd for  $\text{C}_{13}\text{H}_{13}\text{NO}$  ( $\text{M} + \text{H}$ ) $^+$  200.1077, found 200.1071.

#### 4-(naphthalen-1-ylmethyl)pyridine (3aq)<sup>9</sup>

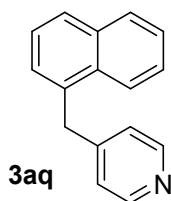

**Compound 3aq:** 70 mg, 64% yield, white solid, mp: 81–82 °C;  $^1\text{H NMR}$  (400 MHz,  $\text{CDCl}_3$ ):  $\delta$  8.37 (d,  $J = 5.8$  Hz, 2H), 7.75 (m, 3H), 7.35 (m, 3H), 7.22 (d,  $J = 6.9$  Hz, 1H), 6.98 (d,  $J = 5.4$  Hz, 2H), 4.31 (s, 2H);  $^{13}\text{C NMR}$  (100 MHz,  $\text{CDCl}_3$ ):  $\delta$  148.83, 148.66, 133.38, 132.97, 130.85, 127.80, 126.77, 126.67, 125.23, 124.77, 124.50, 122.90, 122.88, 37.43; HRMS (ESI) calcd for  $\text{C}_{16}\text{H}_{13}\text{N}$  ( $\text{M} + \text{H}$ ) $^+$  220.1128, found 220.1108.

#### 4-(naphthalen-2-ylmethyl)pyridine (3ar)<sup>9</sup>

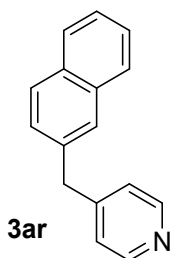

**Compound 3ar:** 71 mg, 65% yield, colorless oil;  $^1\text{H NMR}$  (400 MHz,  $\text{CDCl}_3$ ):  $\delta$  8.41 (dd,  $J = 6.0, 2.9$  Hz, 2H), 7.70 (m, 3H), 7.53 (s, 1H), 7.34 (m, 2H), 7.17 (dd,  $J = 1.7, 1.8$  Hz, 1H), 7.03 (d,  $J = 6.0$  Hz, 2H), 4.01 (s, 2H);  $^{13}\text{C NMR}$  (100 MHz,  $\text{CDCl}_3$ ):  $\delta$  148.87, 148.78, 135.28, 132.50, 131.20, 127.40, 126.64, 126.51, 126.44, 126.28, 125.23, 124.70, 123.21, 40.31; HRMS (ESI) calcd for  $\text{C}_{16}\text{H}_{13}\text{N}$  ( $\text{M} + \text{H}$ ) $^+$  220.1128, found 220.1124.

#### 3-(pyridin-4-ylmethyl)pyridine (3as)

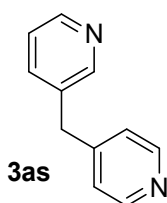

**Compound 3as:** 60 mg, 71% yield, colorless oil;  $^1\text{H NMR}$  (400 MHz,  $\text{CDCl}_3$ ):  $\delta$  8.44 (m, 4H), 7.39 (dt,  $J = 1.6, 1.7$  Hz, 1H), 7.16 (dd,  $J = 4.8, 4.9$  Hz, 1H), 7.02 (d,  $J = 5.9$  Hz, 2H), 3.89 (s, 2H);  $^{13}\text{C NMR}$  (100 MHz,  $\text{CDCl}_3$ ):  $\delta$  149.19, 149.05, 147.63, 147.25, 135.37, 133.37, 123.03, 122.60, 37.30; HRMS (ESI) calcd for  $\text{C}_{11}\text{H}_{10}\text{N}_2$  ( $\text{M} + \text{H}$ ) $^+$  171.0924, found 171.0910.

#### 5-(pyridin-4-ylmethyl)pyrimidine (3at)

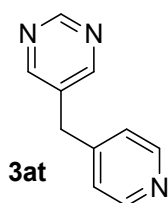

**Compound 3at:** 19 mg, 23% yield, colorless oil;  $^1\text{H NMR}$  (400 MHz,  $\text{CDCl}_3$ ):  $\delta$  9.07 (s, 1H), 8.53 (s, 2H), 8.50 (dd,  $J = 6.0, 3.2$  Hz, 2H), 7.04 (d,  $J = 5.8$  Hz, 2H), 3.91 (s, 2H);  $^{13}\text{C NMR}$  (100 MHz,  $\text{CDCl}_3$ ):  $\delta$  156.46, 156.07, 149.35, 146.13, 131.33, 122.88, 34.82; HRMS (ESI) calcd for  $\text{C}_{10}\text{H}_{10}\text{N}_3$  ( $\text{M} + \text{H}$ ) $^+$

172.0876, found 172.0871.

#### 4-benzyl-3-methylpyridine (**3aw**)<sup>10</sup>

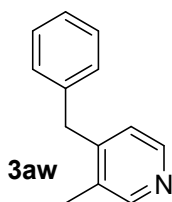

*Compound 3aw*: 46 mg, 51% yield, colorless oil; <sup>1</sup>H NMR (400 MHz, CDCl<sub>3</sub>): δ 8.30 (s, 1H), 8.28 (d, *J* = 5.0 Hz, 1H), 7.22 (t, *J* = 7.4 Hz, 2H), 7.17 (t, *J* = 5.9 Hz, 1H), 7.04 (d, *J* = 7.5 Hz, 2H), 6.89 (d, *J* = 4.9 Hz, 1H), 3.88 (s, 2H), 2.17 (s, 3H); <sup>13</sup>C NMR (100 MHz, CDCl<sub>3</sub>): δ 149.74, 146.84, 146.67, 137.21, 131.05, 127.85, 127.64, 125.50, 123.30, 37.69, 15.35. HRMS (ESI) calcd for C<sub>13</sub>H<sub>14</sub>N (M + H)<sup>+</sup> 184.1128, found 184.1114.

#### 4-(4-fluorobenzyl)-3-methylpyridine (**3ax**)

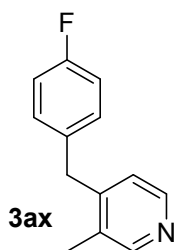

*Compound 3ax*: 57 mg, 57% yield, colorless oil; <sup>1</sup>H NMR (400 MHz, CDCl<sub>3</sub>): δ 8.29 (d, *J* = 7.4 Hz, 2H), 6.99 (t, *J* = 6.8 Hz, 2H), 6.91 (t, *J* = 8.5 Hz, 2H), 6.87 (d, *J* = 4.9 Hz, 1H), 3.85 (s, 2H), 2.16 (s, 3H); <sup>13</sup>C NMR (100 MHz, CDCl<sub>3</sub>): δ 149.82, 146.75, 146.63, 131.90 (d, *J* = 113.4 Hz), 129.2963, 129.2179, 127.75 (d, *J* = 21.2 Hz), 123.15, 114.59, 114.38, 36.88, 15.31; <sup>19</sup>F NMR (375 MHz, CDCl<sub>3</sub>): δ -116.43. HRMS (ESI) calcd for C<sub>13</sub>H<sub>13</sub>FN (M + H)<sup>+</sup> 202.1034, found 202.1011.

#### 4-(4-chlorobenzyl)-3-methylpyridine (**3ay**)

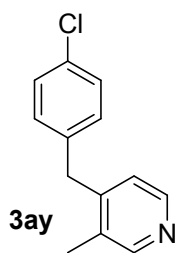

*Compound 3ay*: 60 mg, 56% yield, colorless oil; <sup>1</sup>H NMR (400 MHz, CDCl<sub>3</sub>): δ 8.29 (d, *J* = 7.7 Hz, 2H), 7.18 (d, *J* = 8.0 Hz, 2H), 6.95 (d, *J* = 8.0 Hz, 2H), 6.87 (d, *J* = 4.9 Hz, 1H), 3.84 (s, 2H), 2.14 (s, 3H); <sup>13</sup>C NMR (100 MHz, CDCl<sub>3</sub>): δ 149.84, 146.75, 146.28, 135.67, 131.40, 130.99, 129.15, 127.79, 123.19, 37.04, 15.32. HRMS (ESI) calcd for C<sub>13</sub>H<sub>13</sub>ClN (M + H)<sup>+</sup> 218.0738, found 218.0726.

## References

1. M. S. Dionicio, B. Melillo, L. Sanchez, Y. Liang, E. Lam, K. N. Houk, A. B. Smith, *J. Am. Chem. Soc.*, 2016, **138**, 1836.
2. D. K. Chand, M. Fujita, K. Biradha, S. Sakamoto, K. Yamaguchi, *Dalton Trans.*, 2003, **13**, 2750.
3. Y. Kato, T. Mase, *Tetrahedron*, 1999, **40**, 8823.
4. S. M. N. Efangé, R. H. Michelson, R. P. Rimmel, R. J. Boudreau, A. K. Dutta, A. Freshler, *J. Med. Chem.*, 1990, **33**, 3133.
5. S. Duez, A. K. Steib, S. M. Manolikakes, P. Knochel, *Angew. Chem., Int. Ed.*, 2011, **50**, 7686.
6. J. Bosch, J. Bonjoch, A. Diez, A. Linares, M. Moral, M. Rubiralta, *Tetrahedron*, 1985, **41**, 1753.
7. P. H. Lee, K. Lee, J. S. Shim, S. G. Lee, S. Kim, *Heterocycles*, 2006, **67**, 777.
8. B. Agai, A. Prosznyak, G. Tarkanyi, L. Vida, F. Faigl, *Eur. J. Org. Chem.*, 2004, **17**, 3623.
9. F.-L. Dai, Q.-W. Gui, J.-D. Liu, Z.-Y. Yang, X. Chen, R.-Q. Guo, Z. Tan, *Chem. Commun.*, 2013, **49**, 4634.
10. T. L. Shing, W. L. Chia, M. J. Shiao, T. Y. Chau, *Synthesis*, 1991, **1991**, 849.

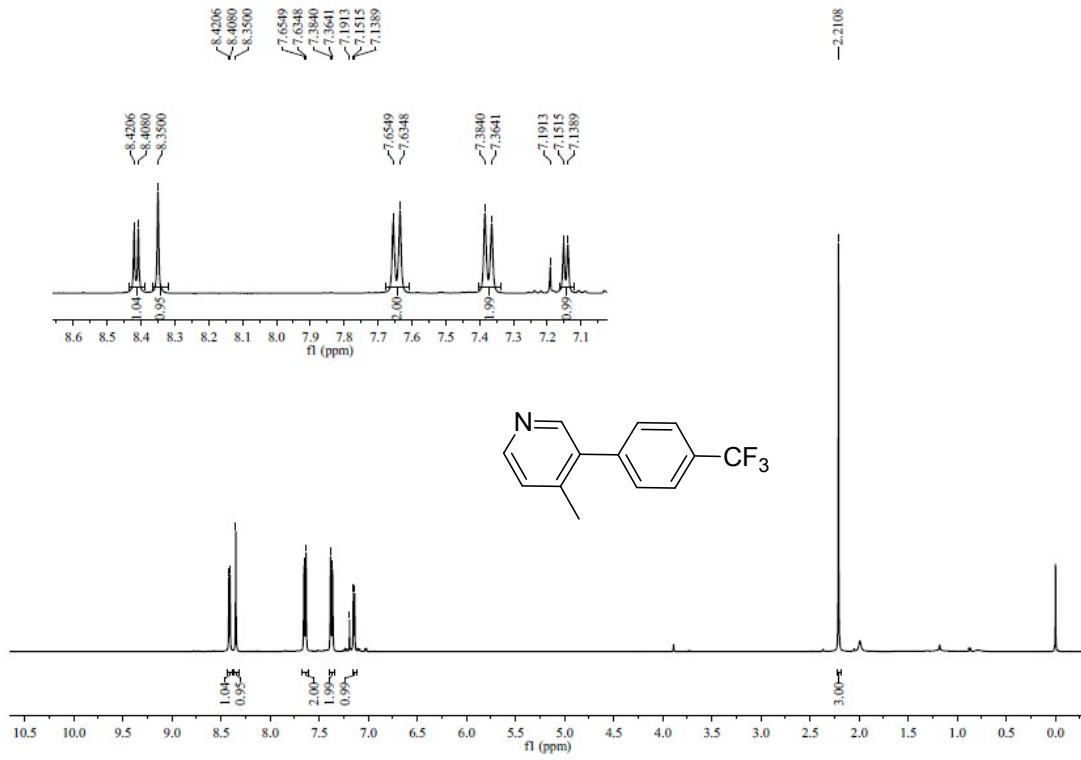

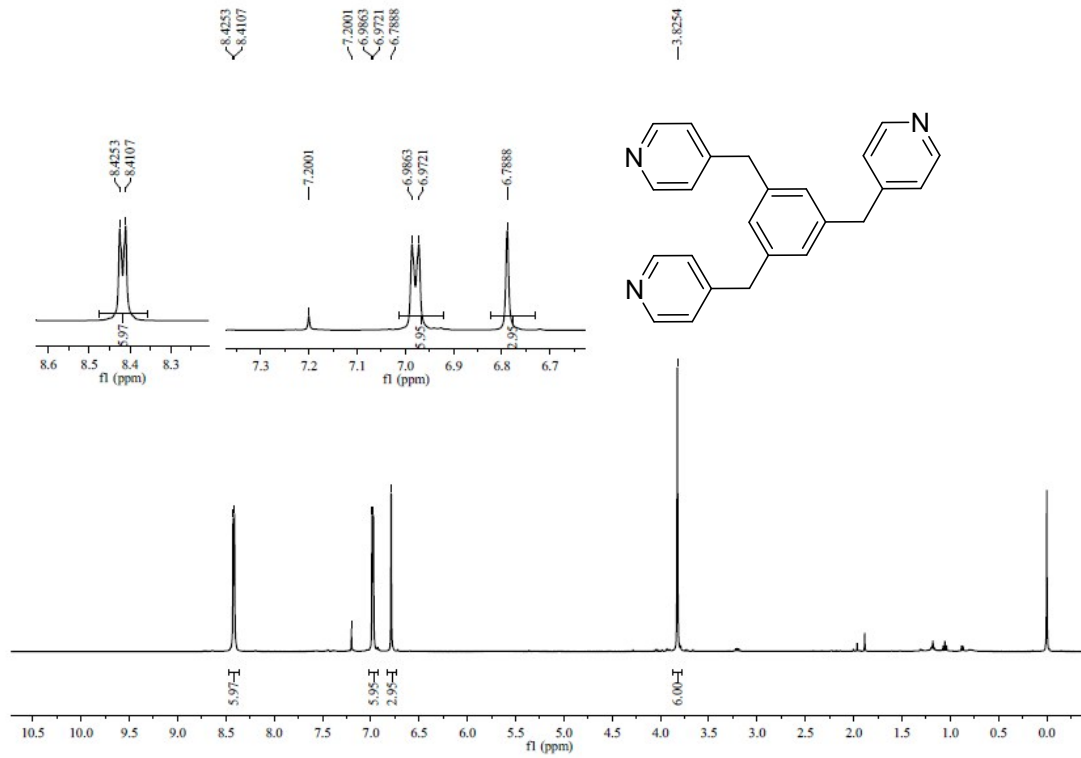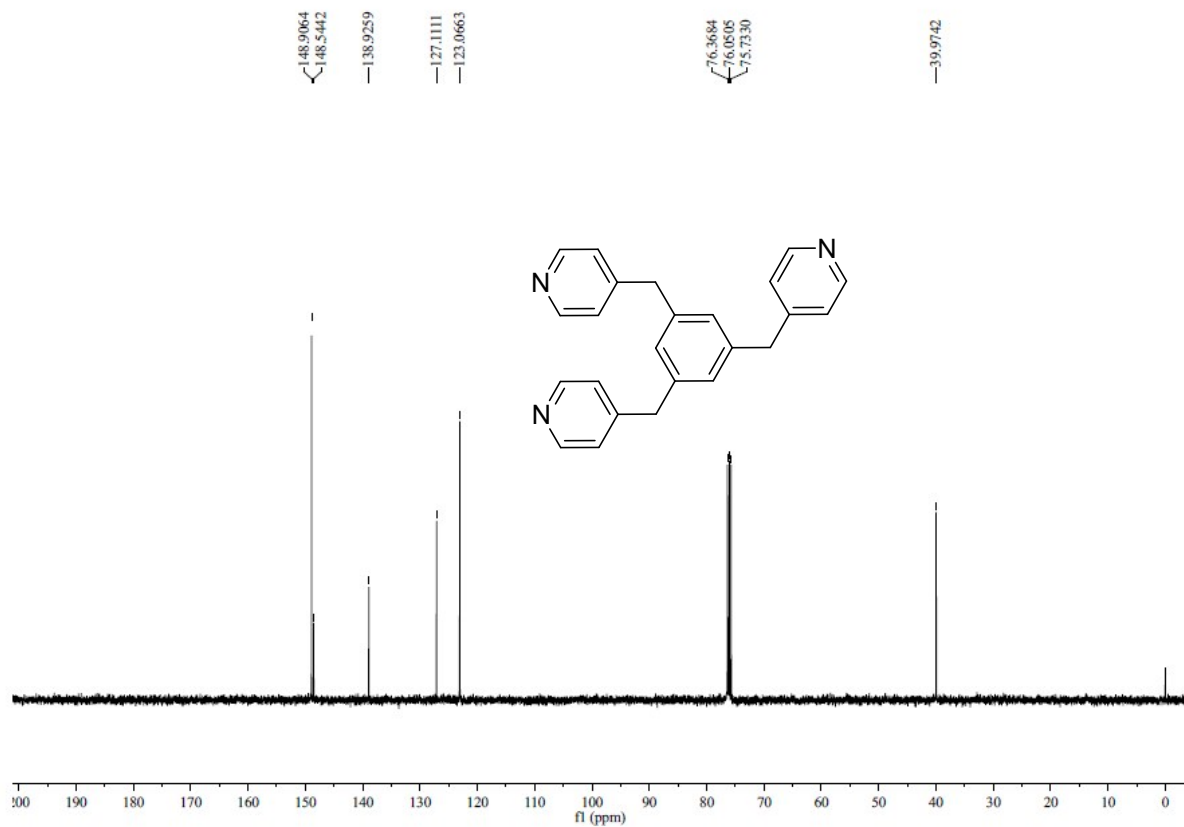

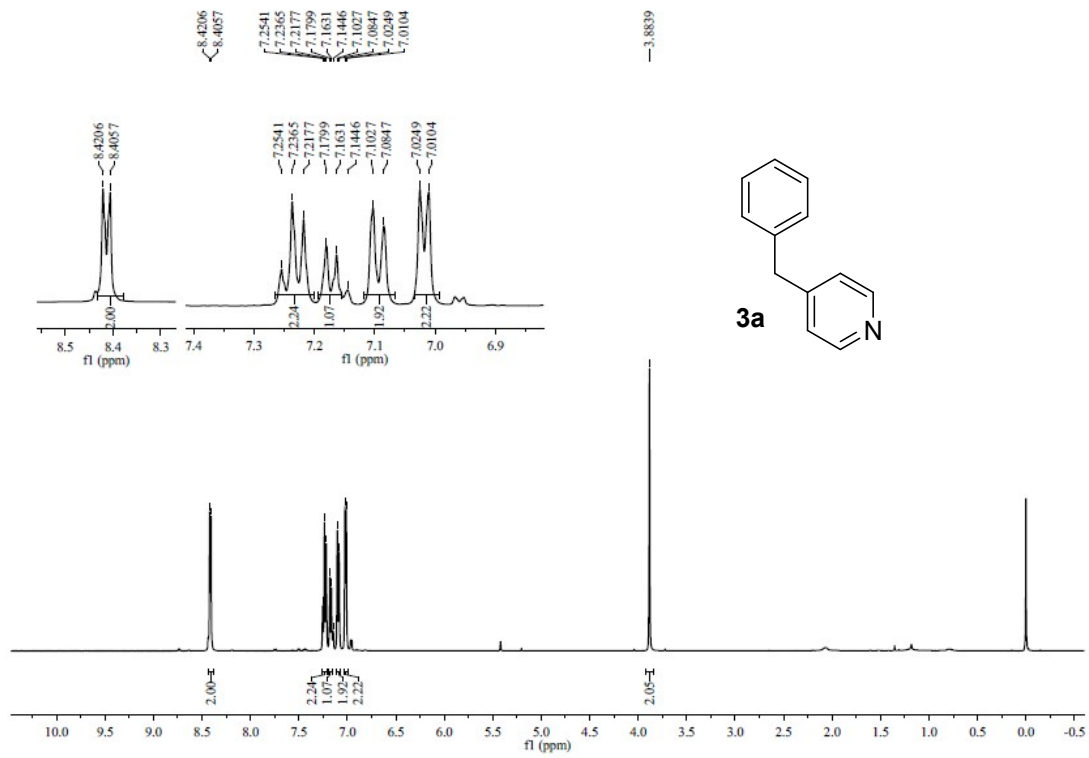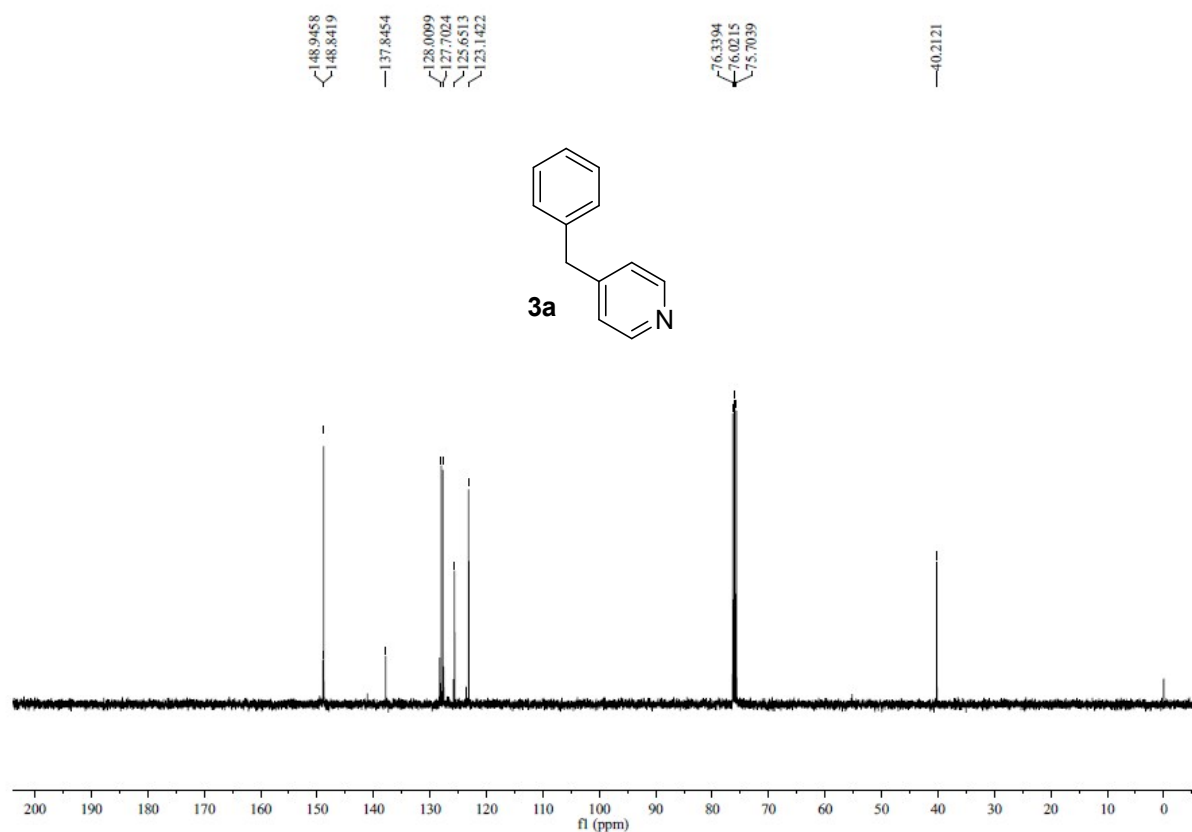

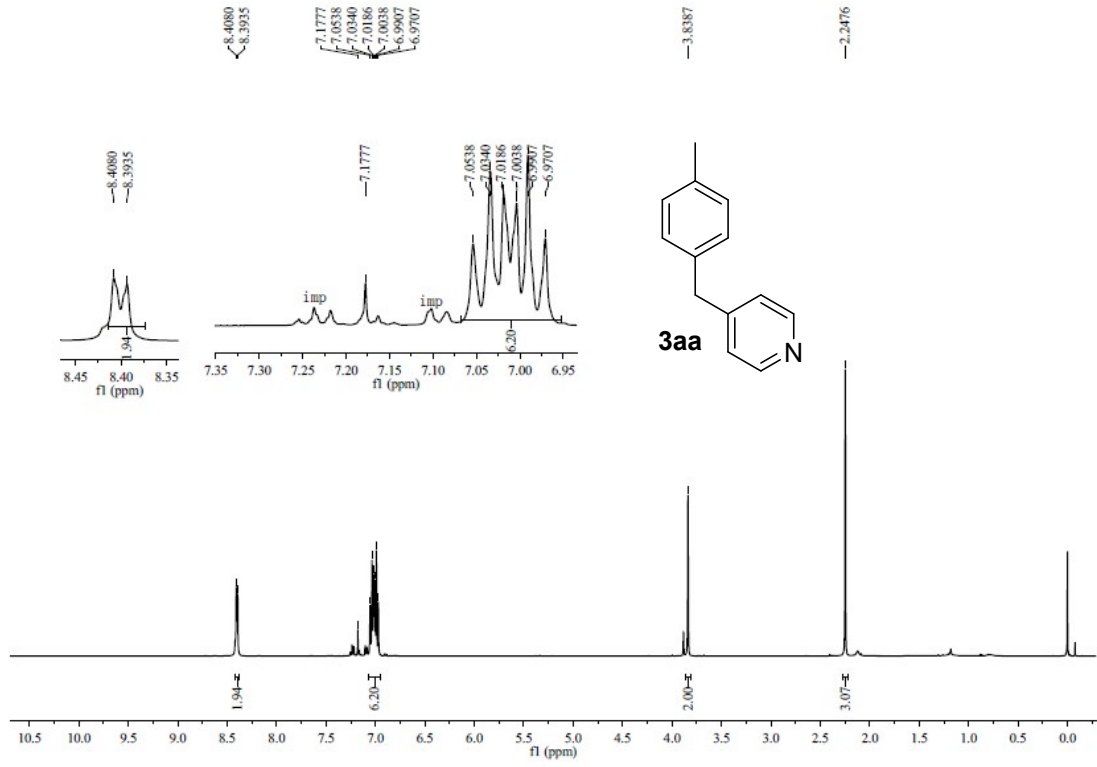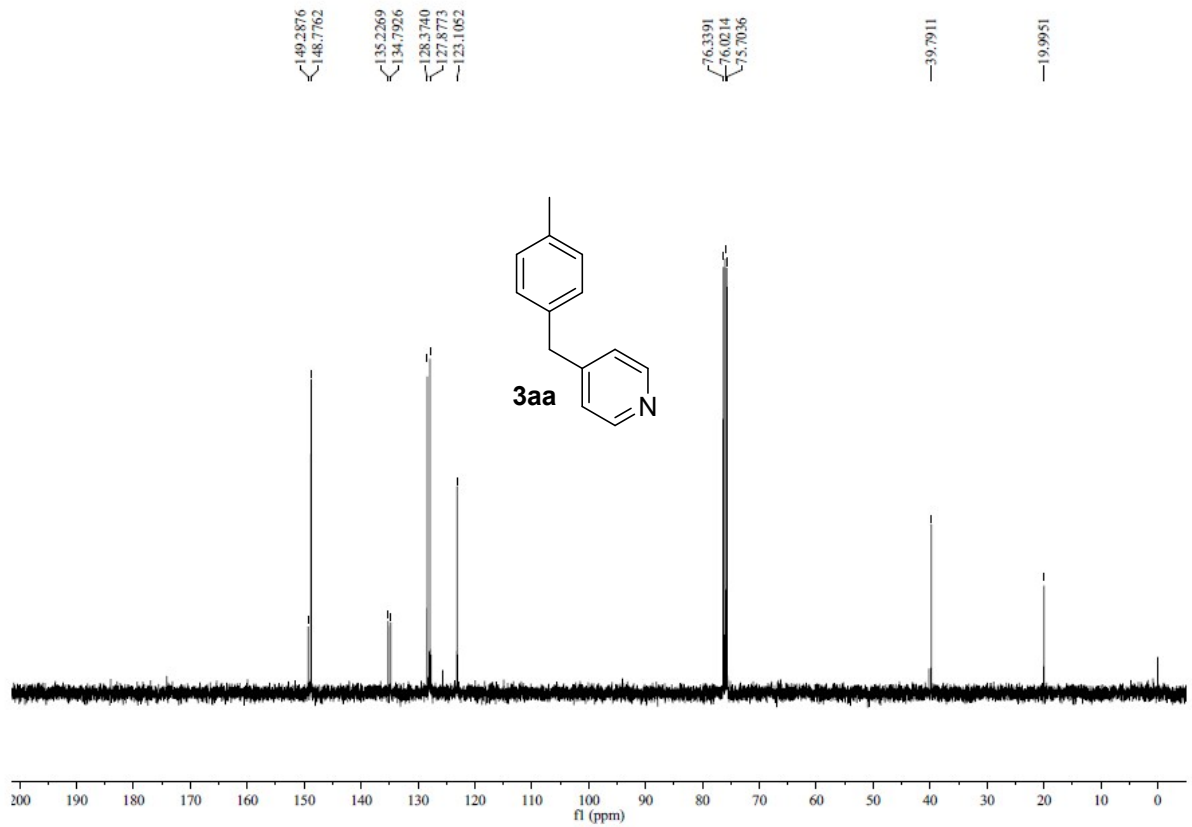

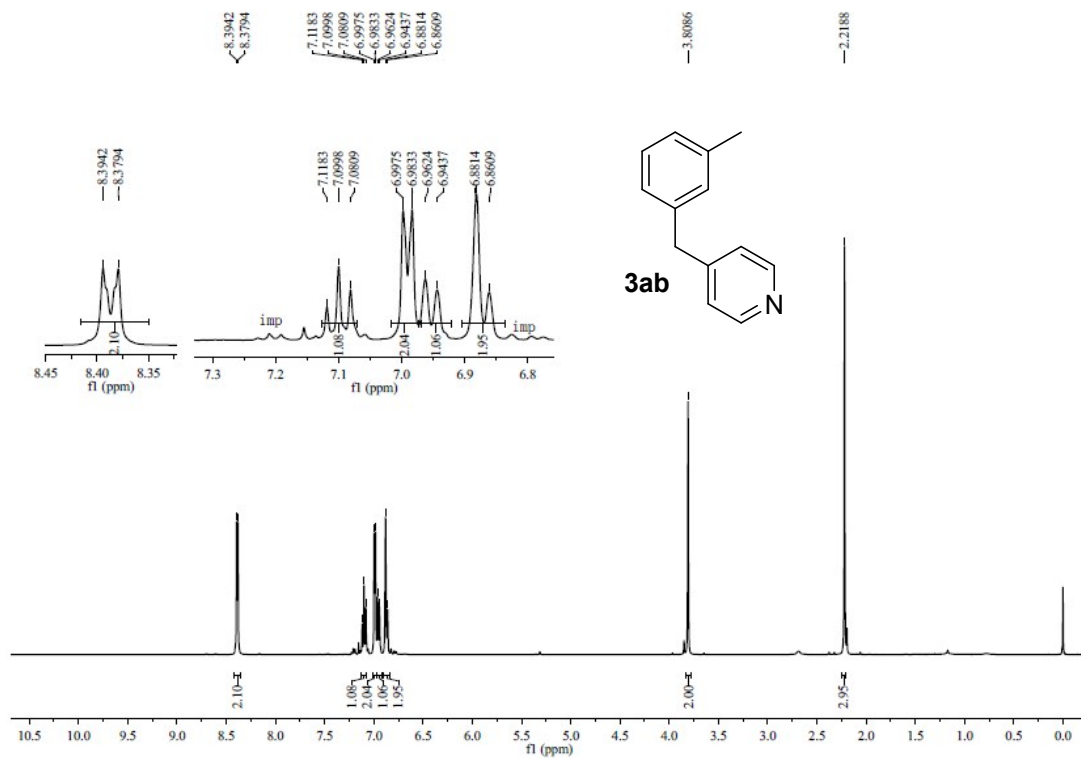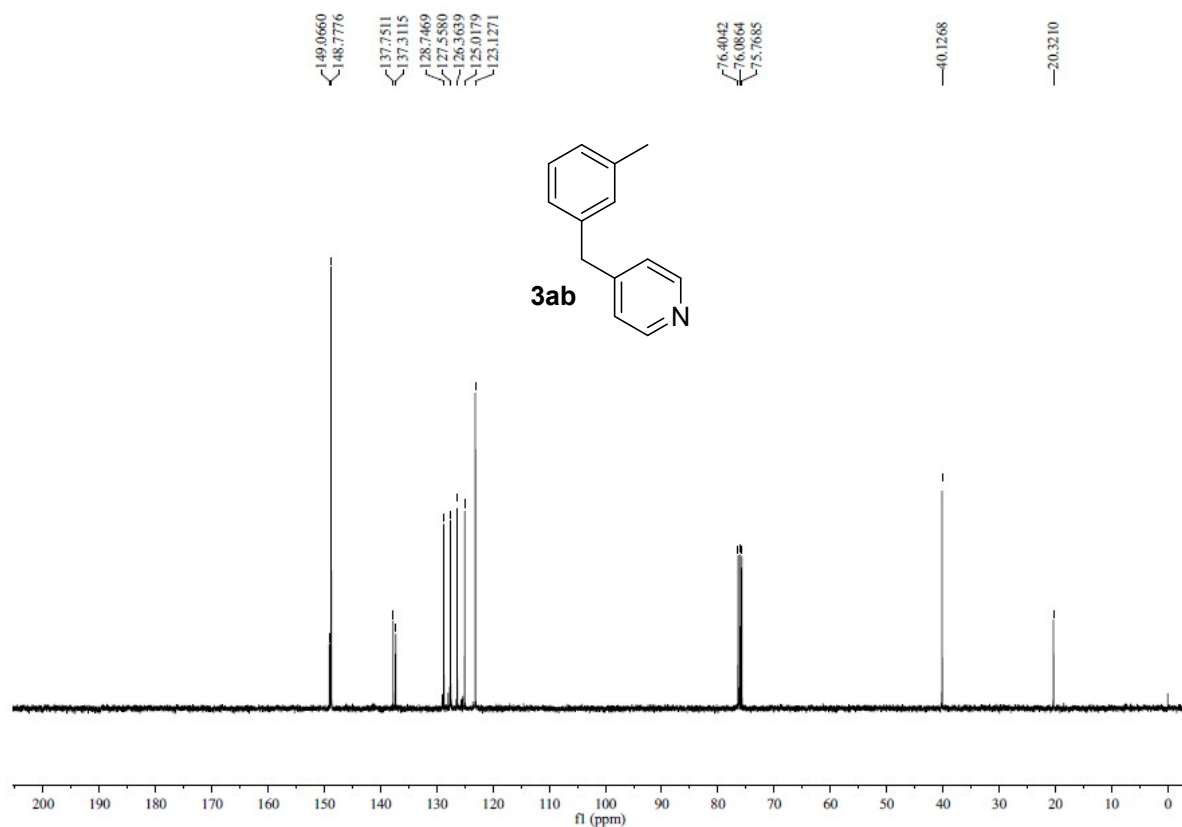



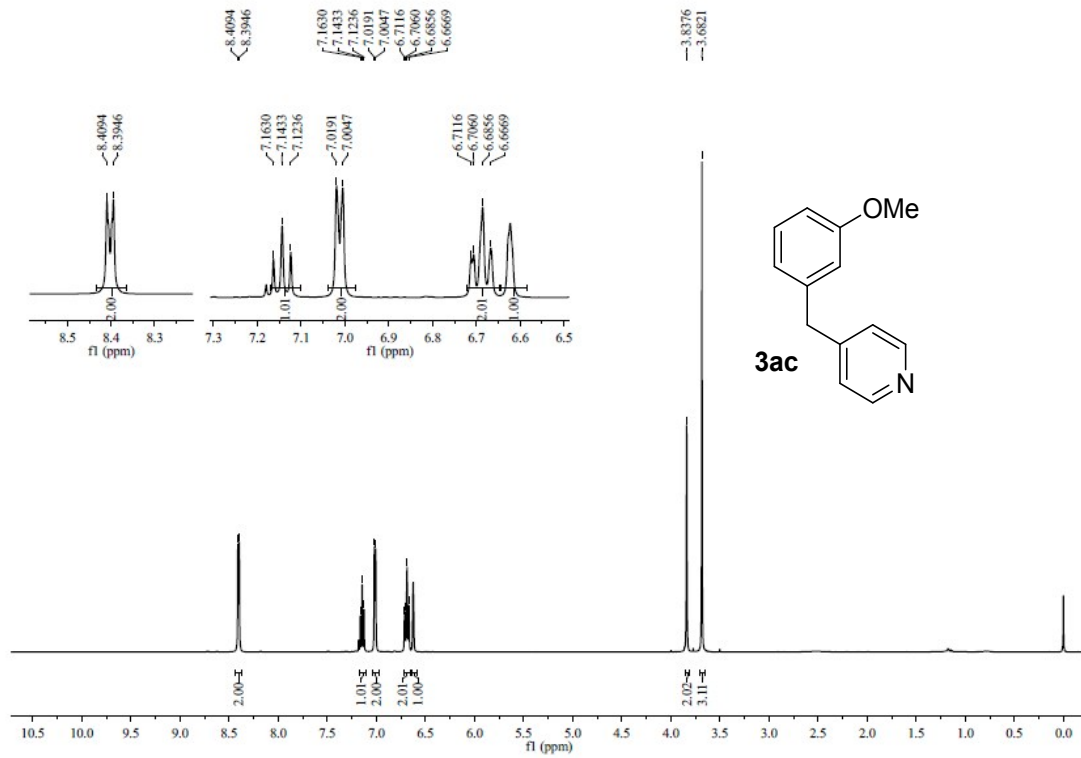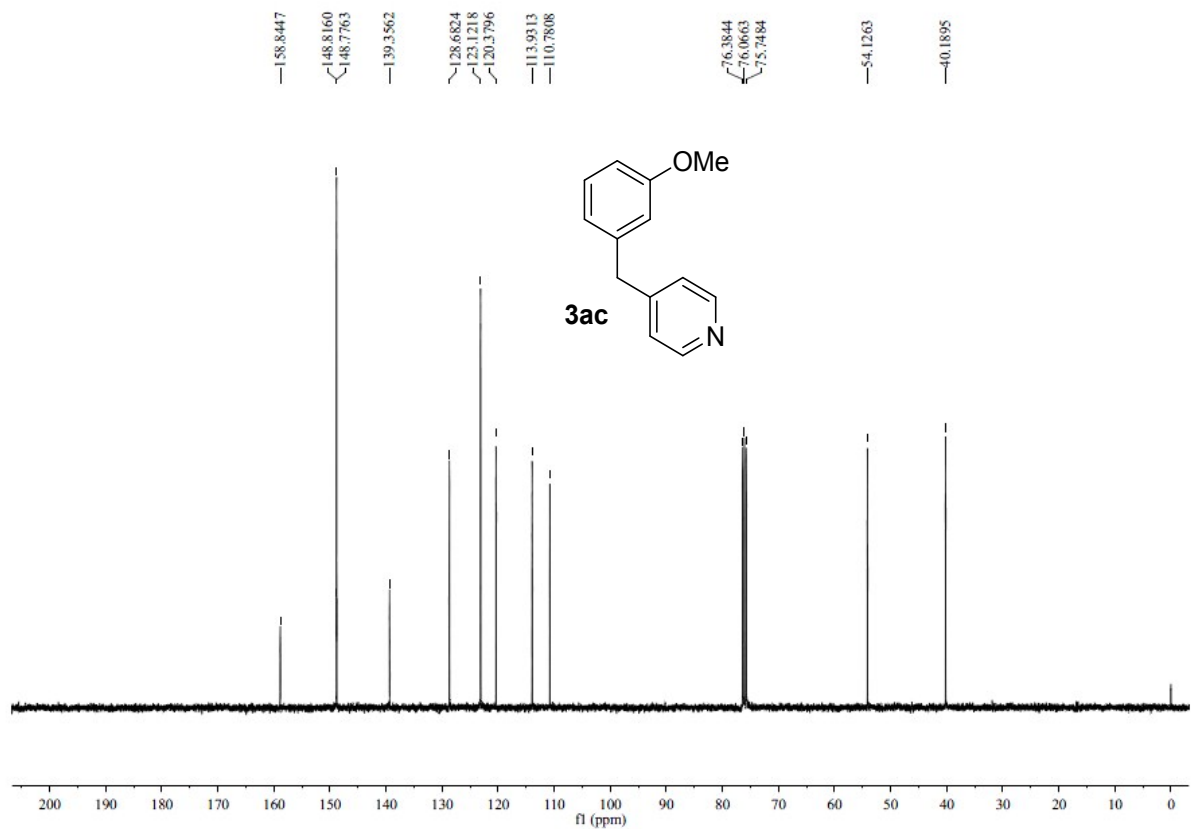

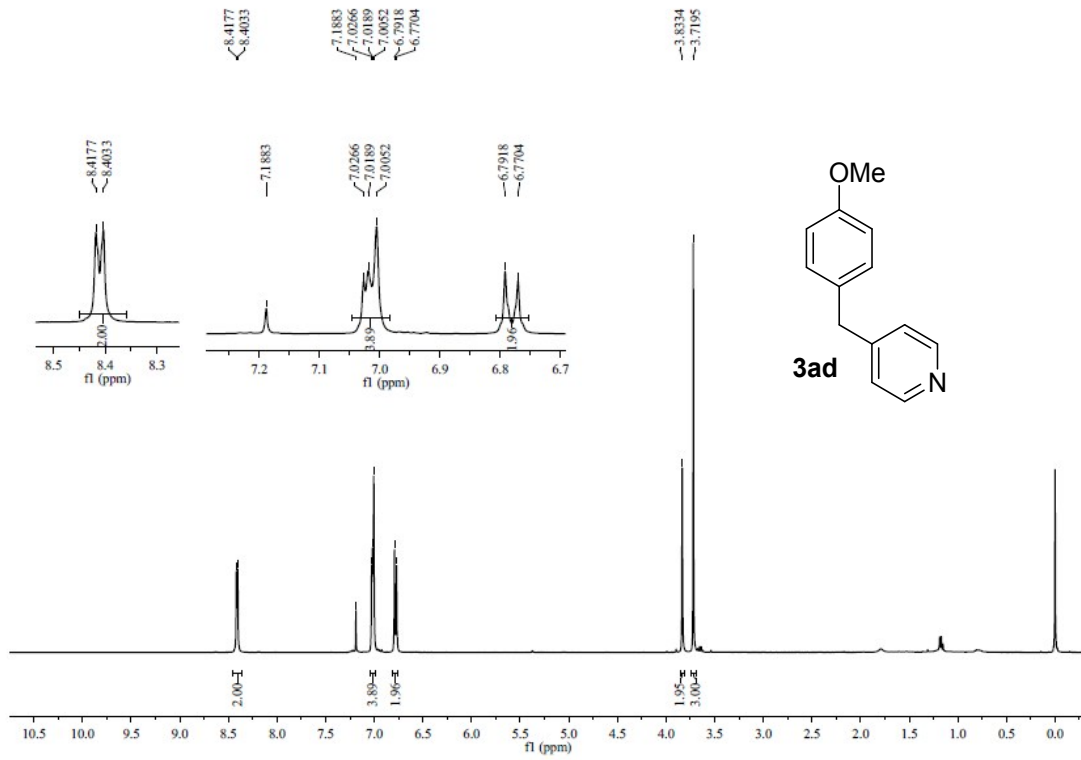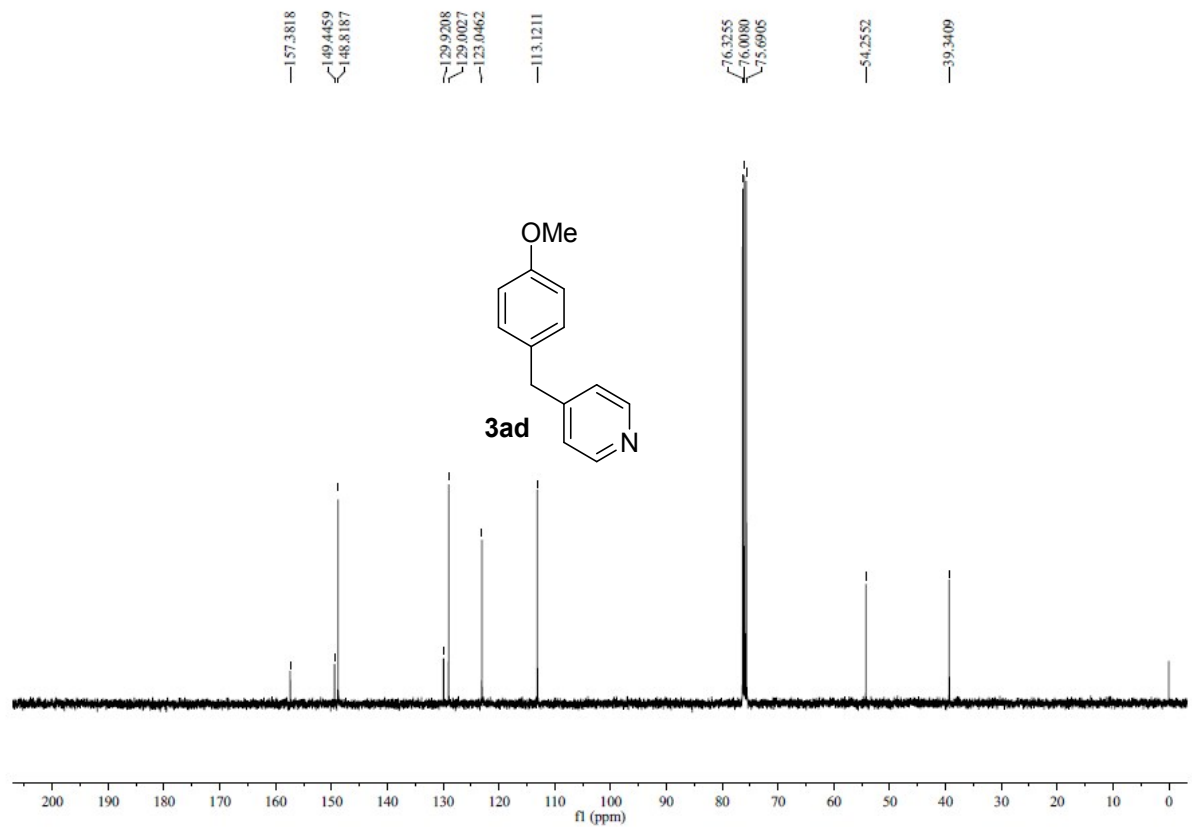

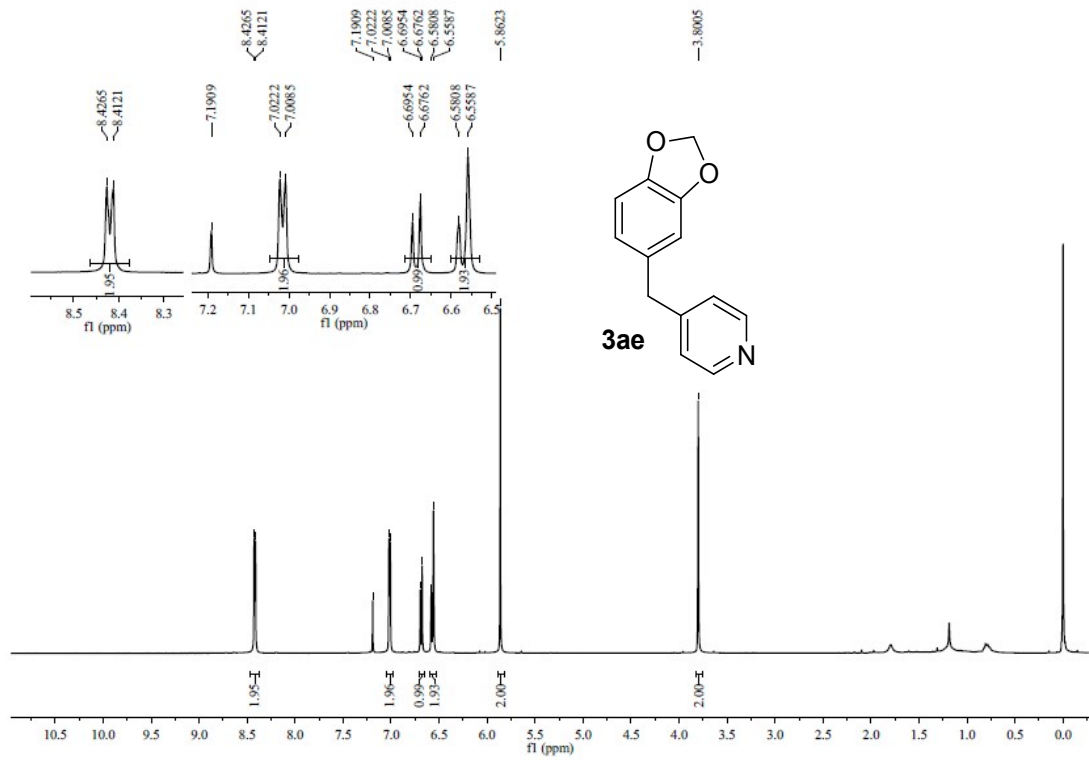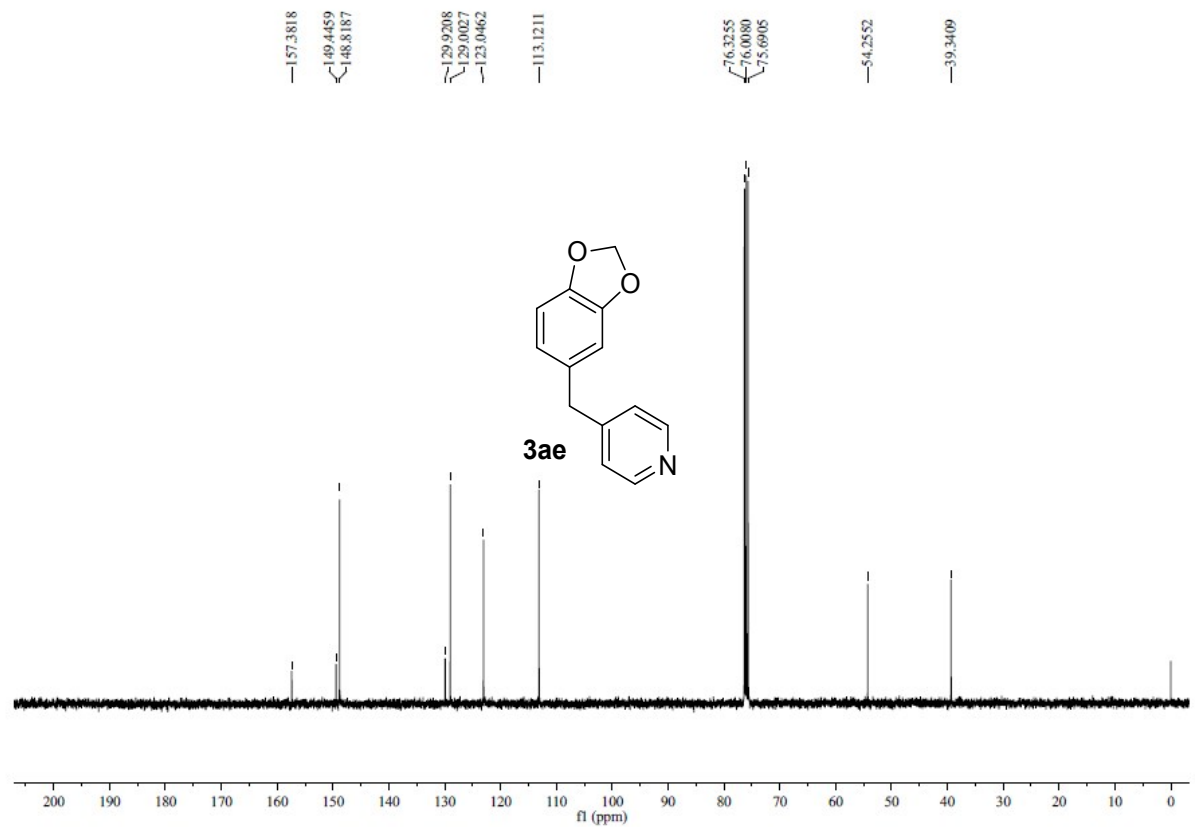

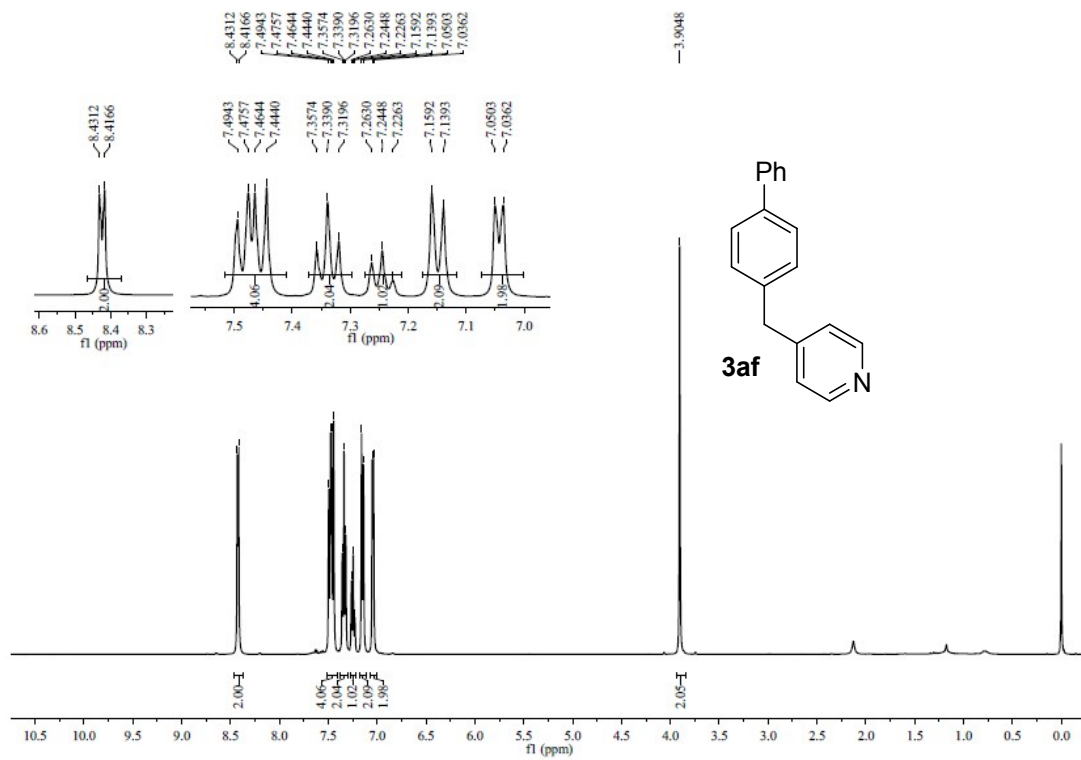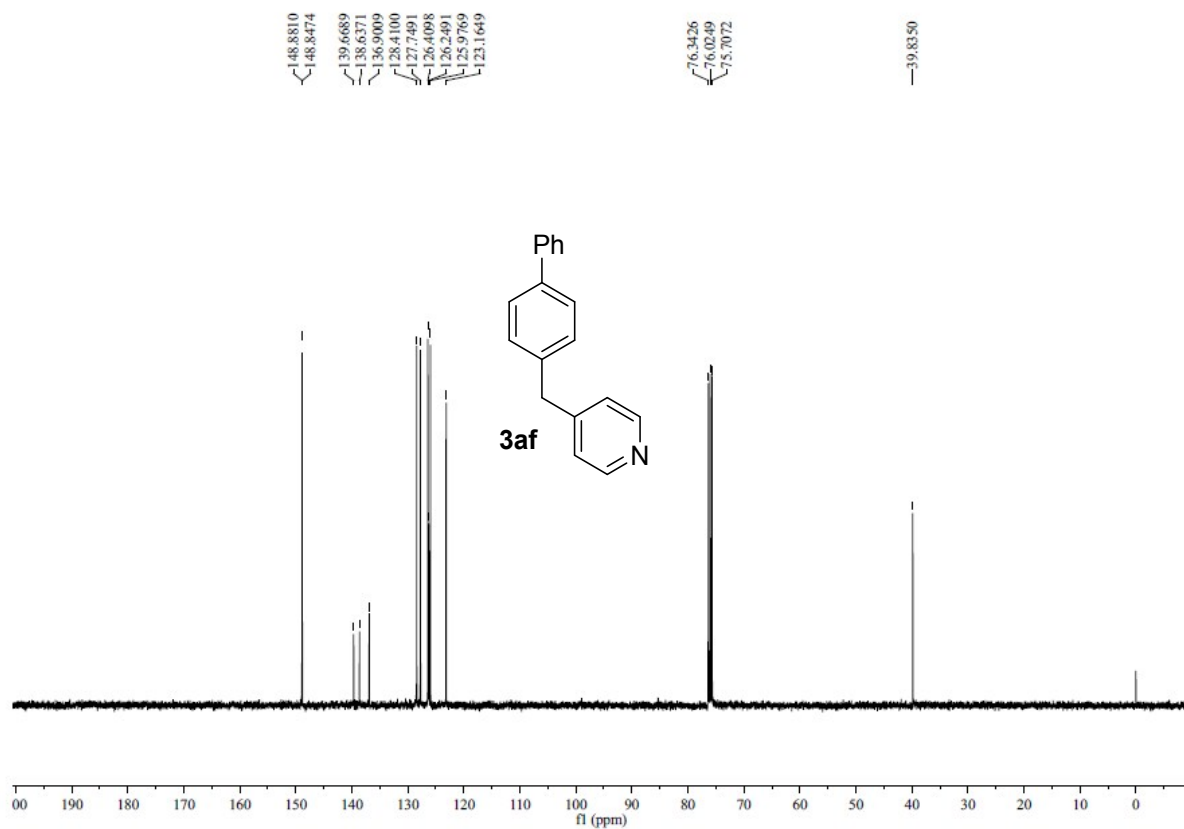

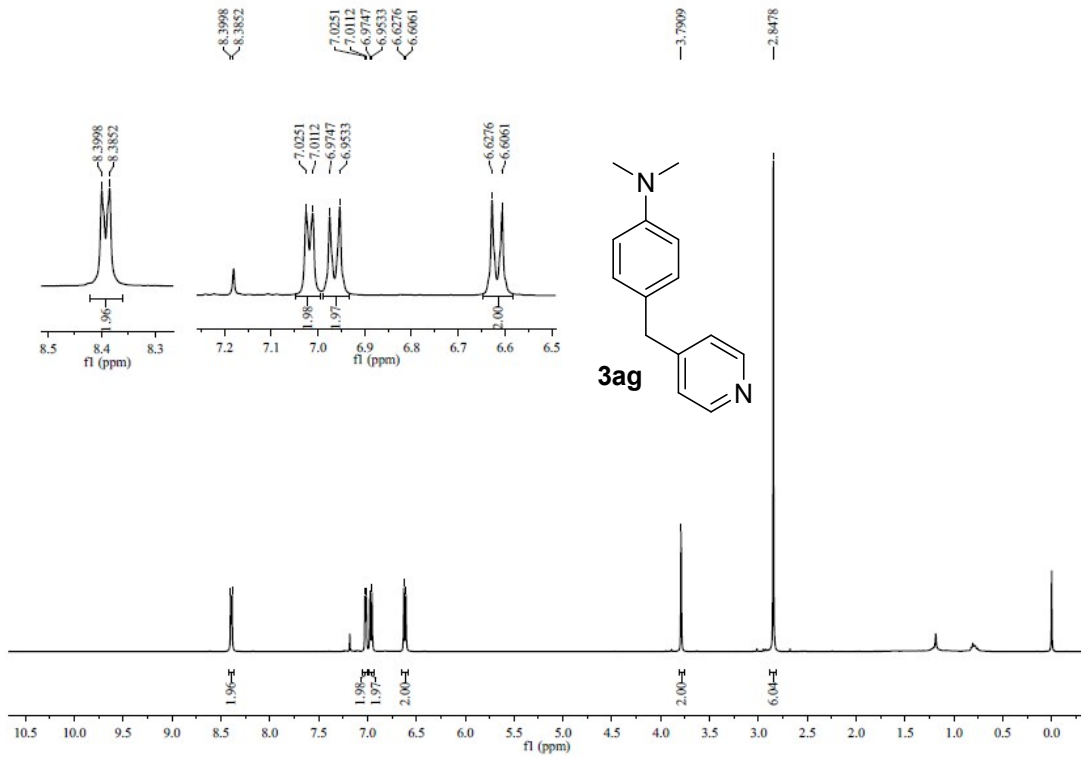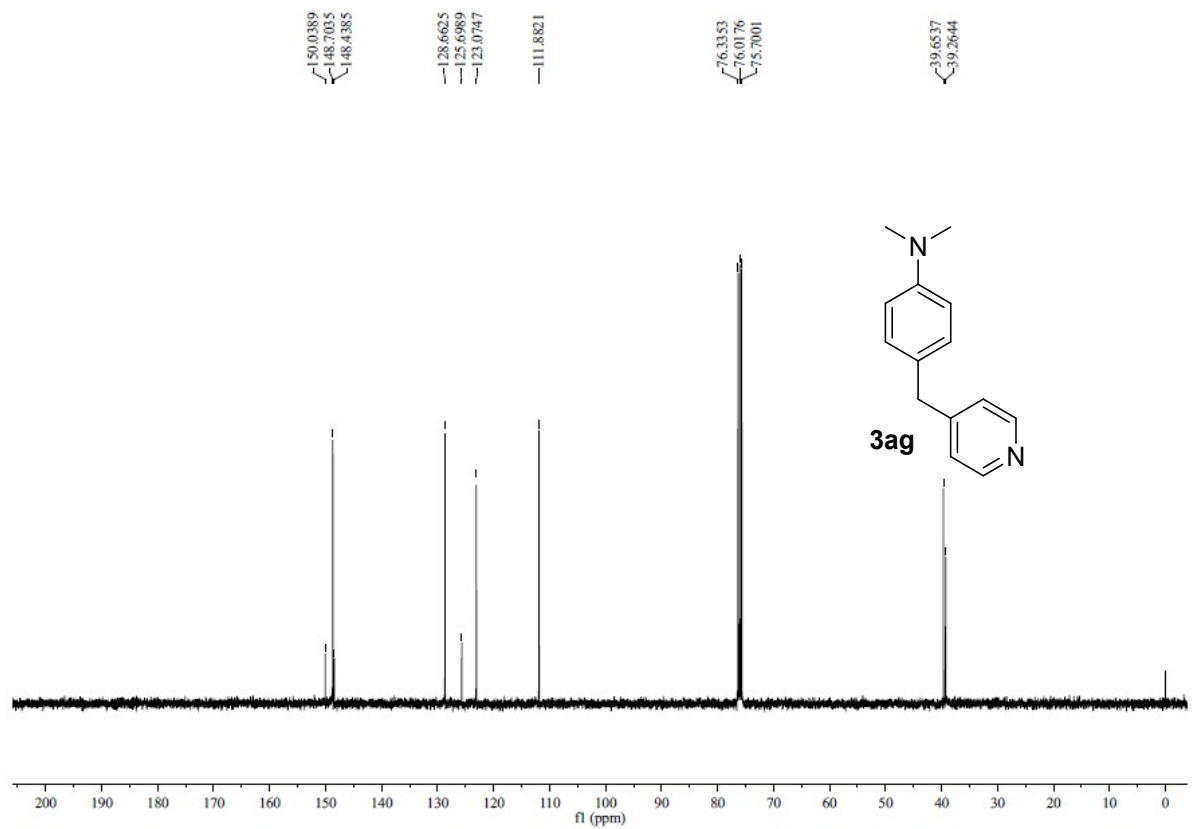

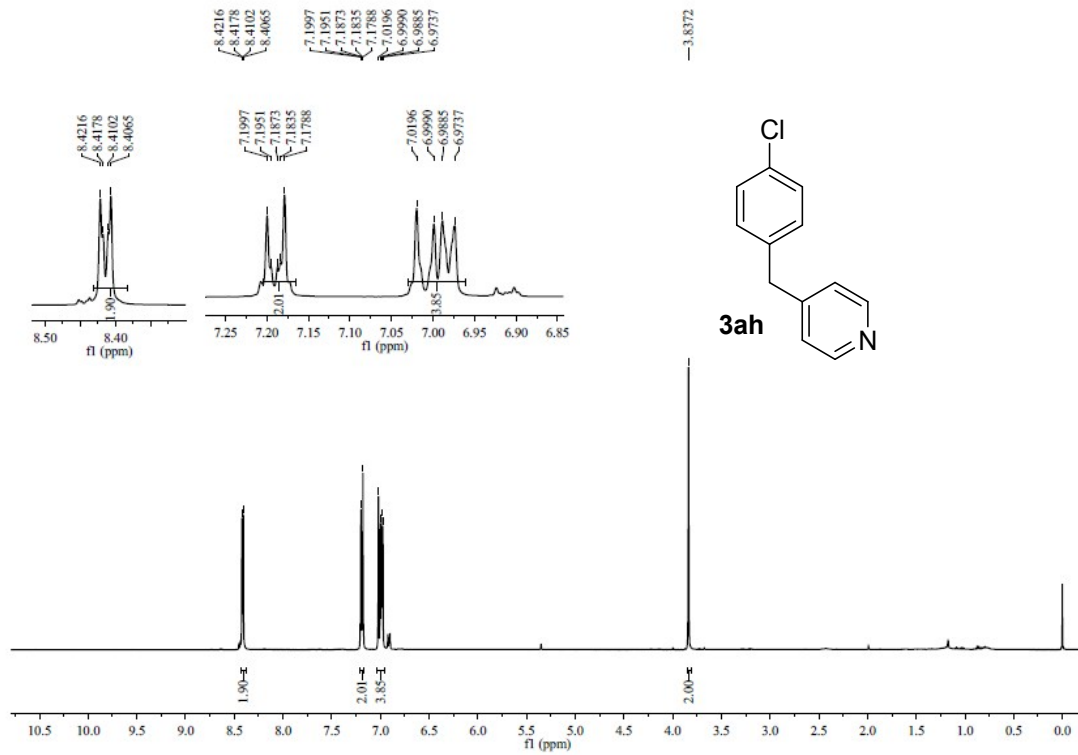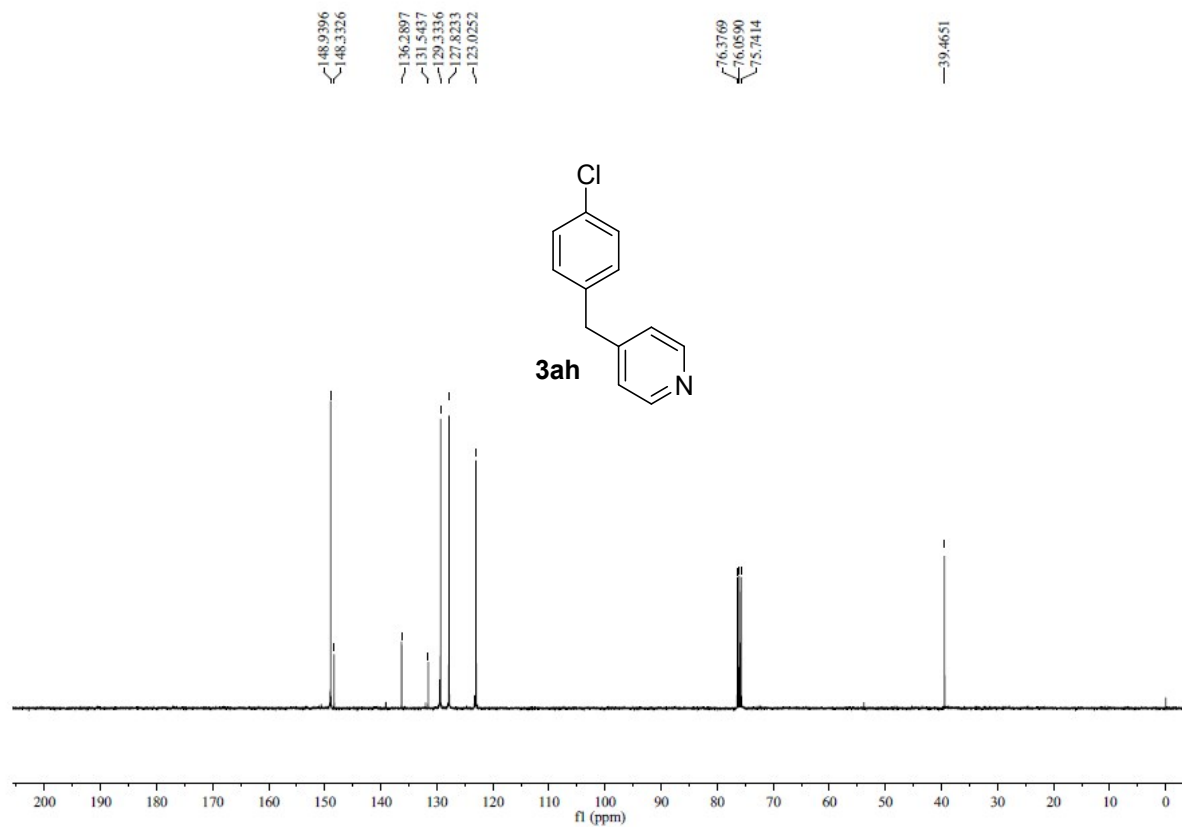

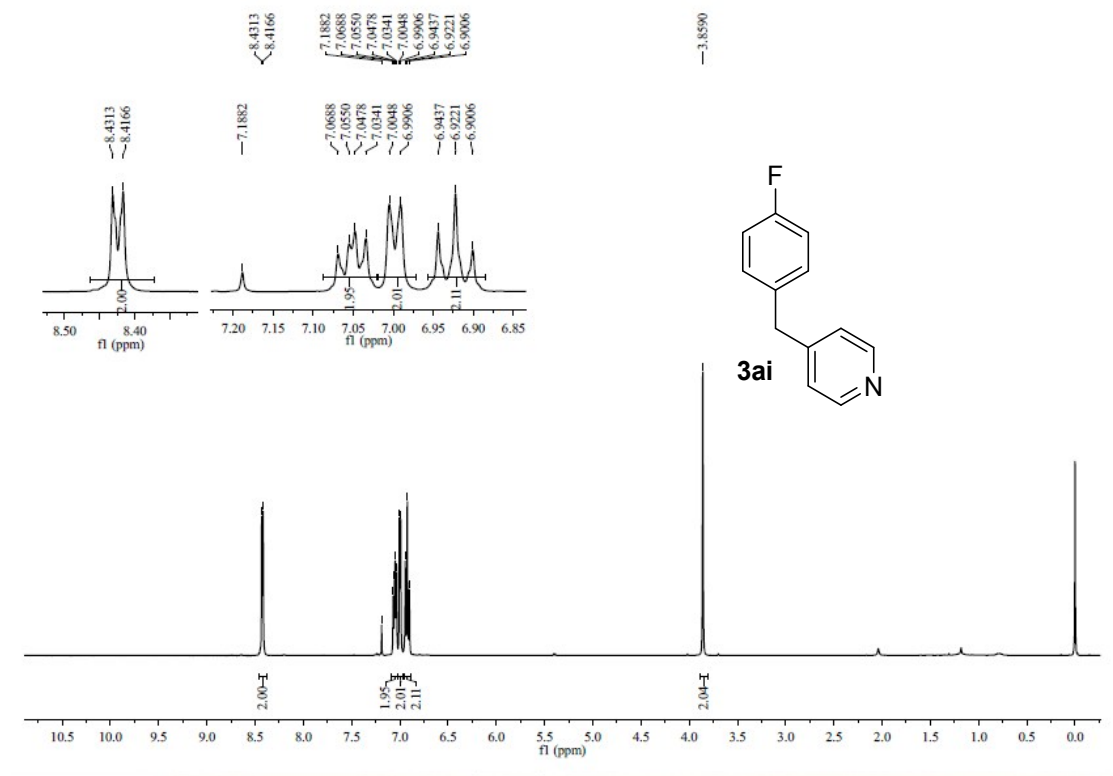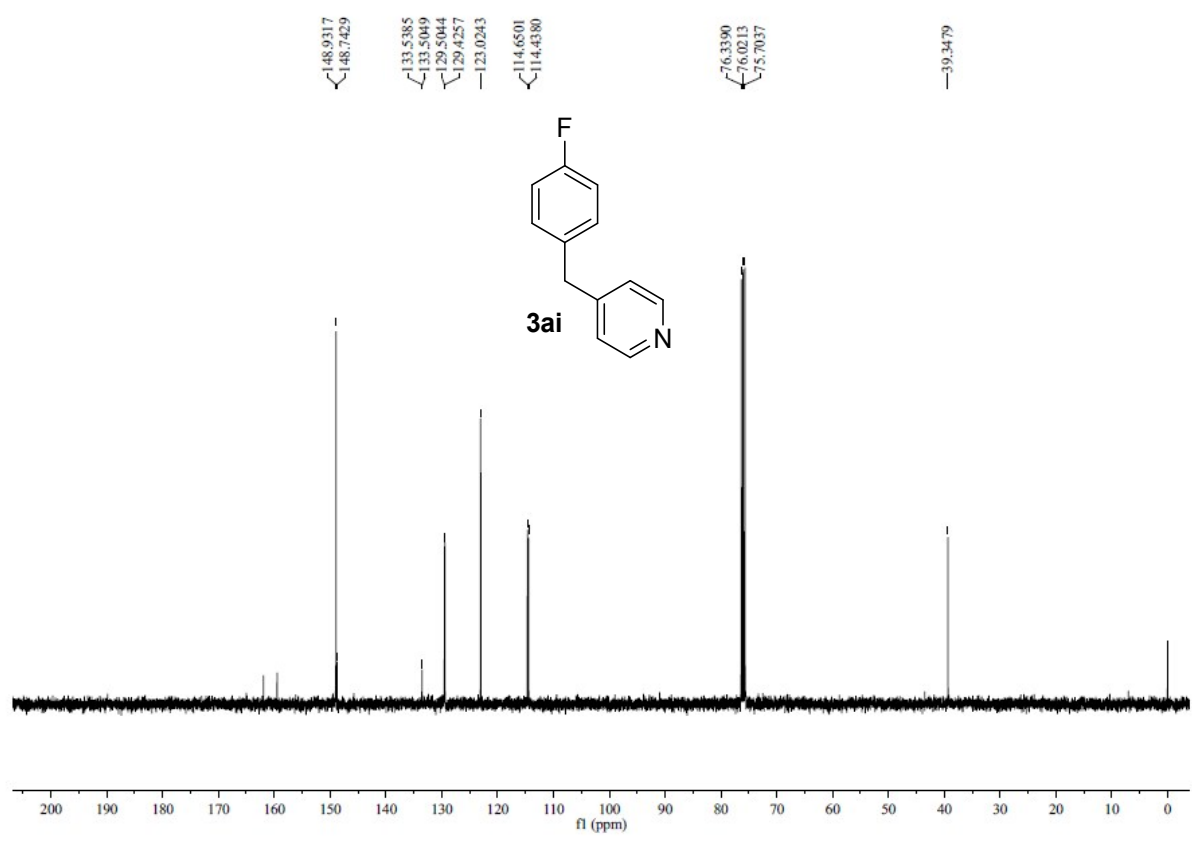

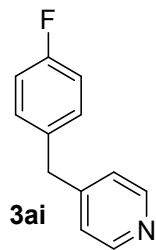

— 116.2360

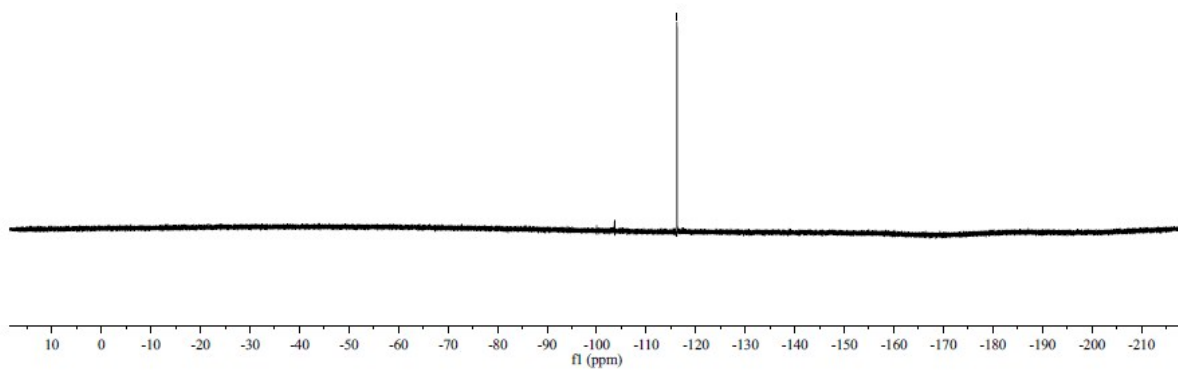



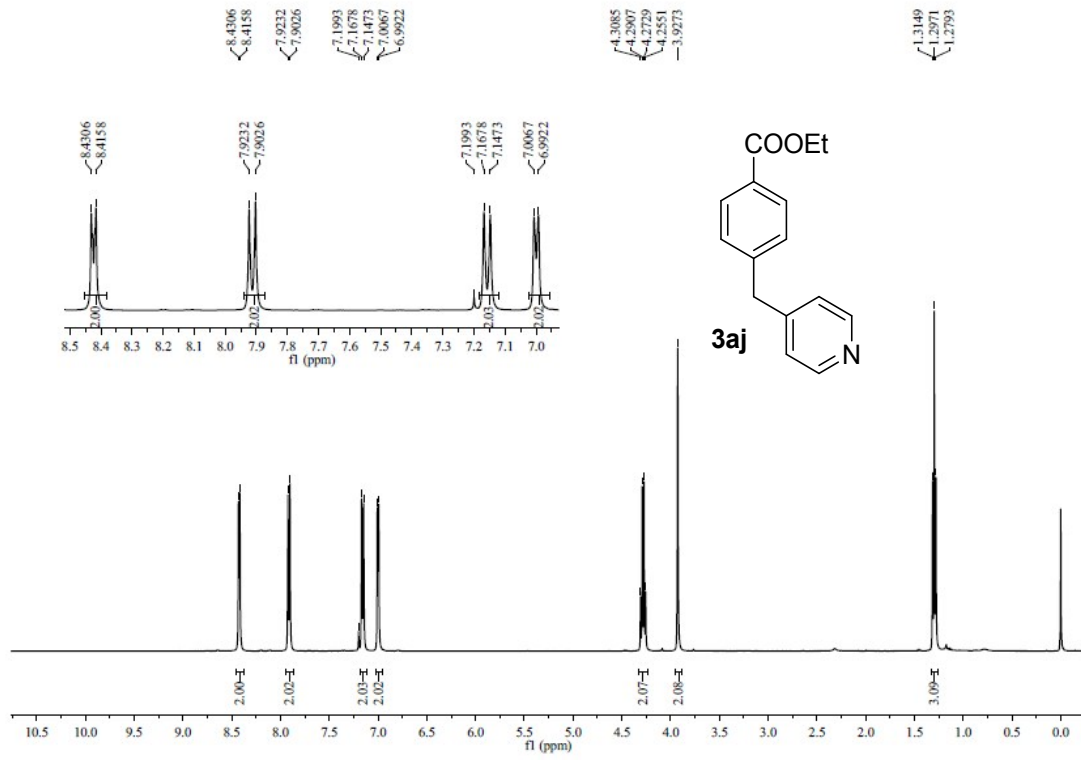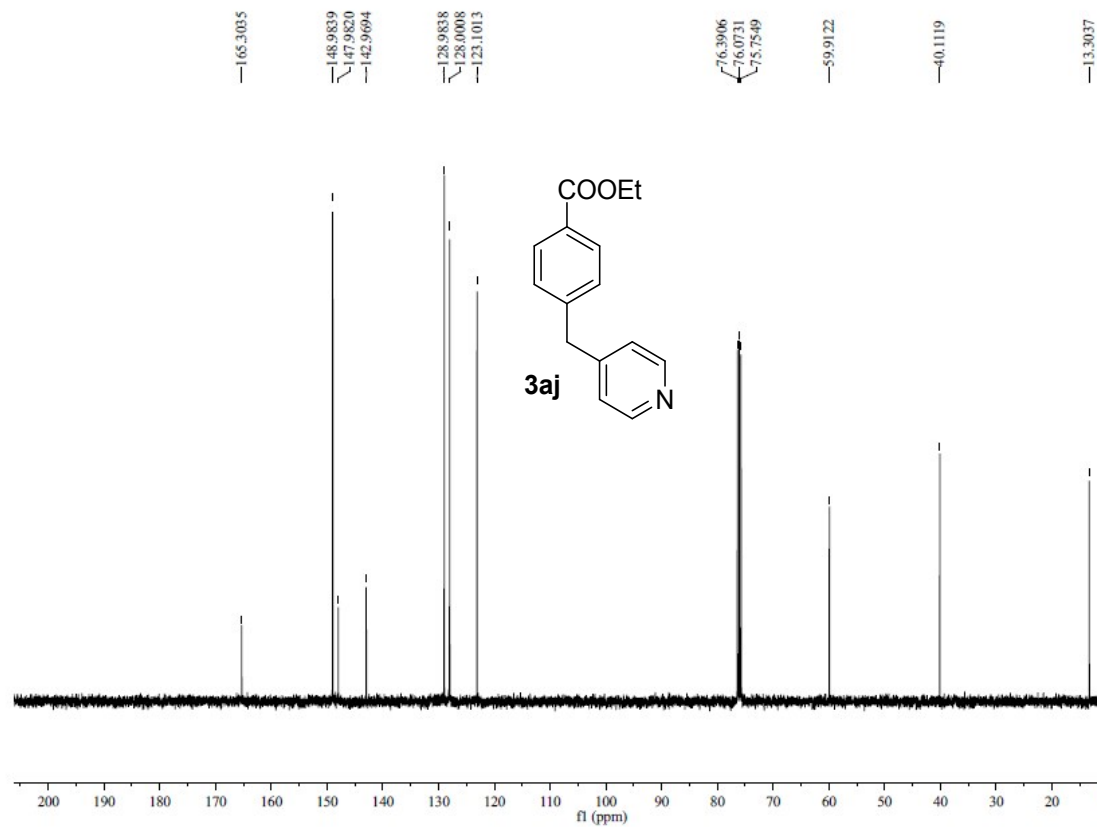

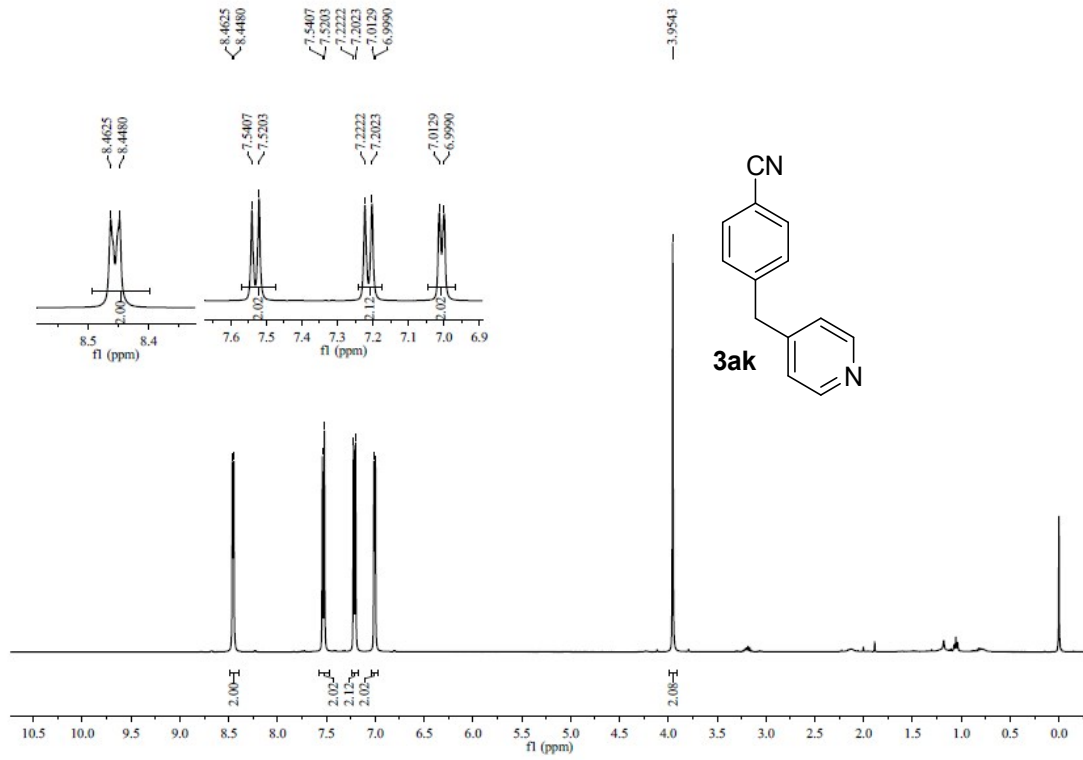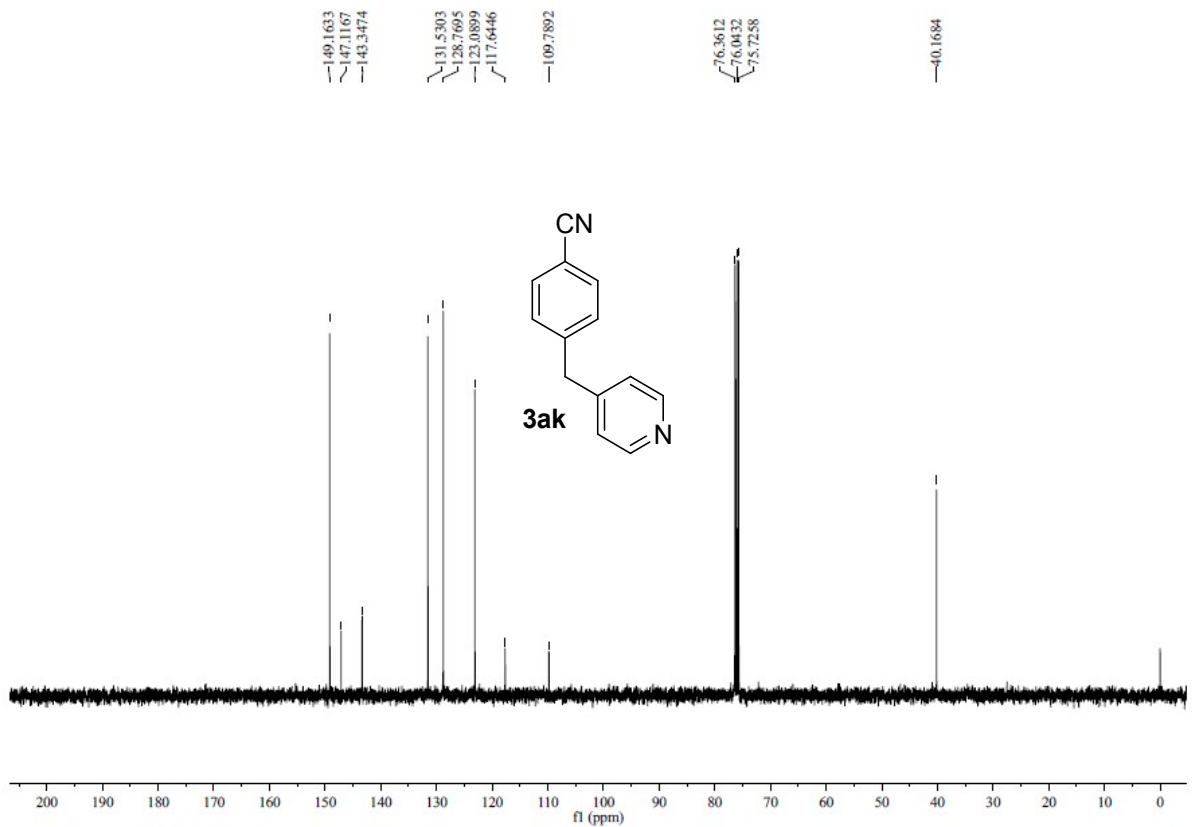

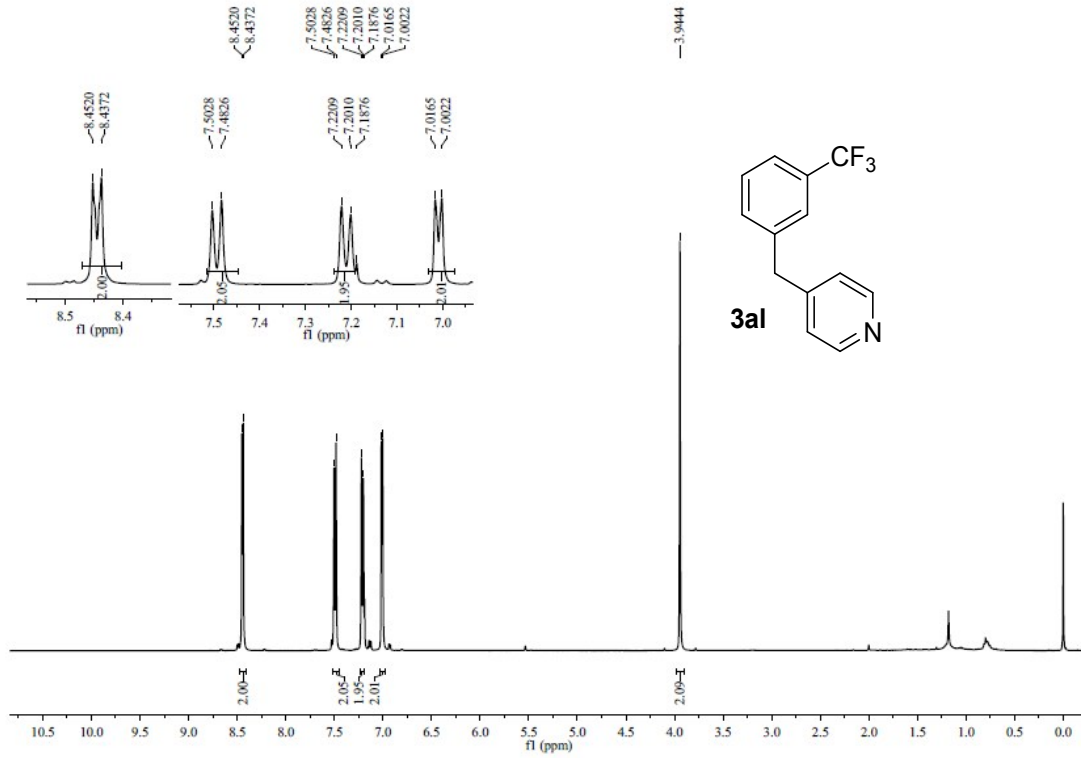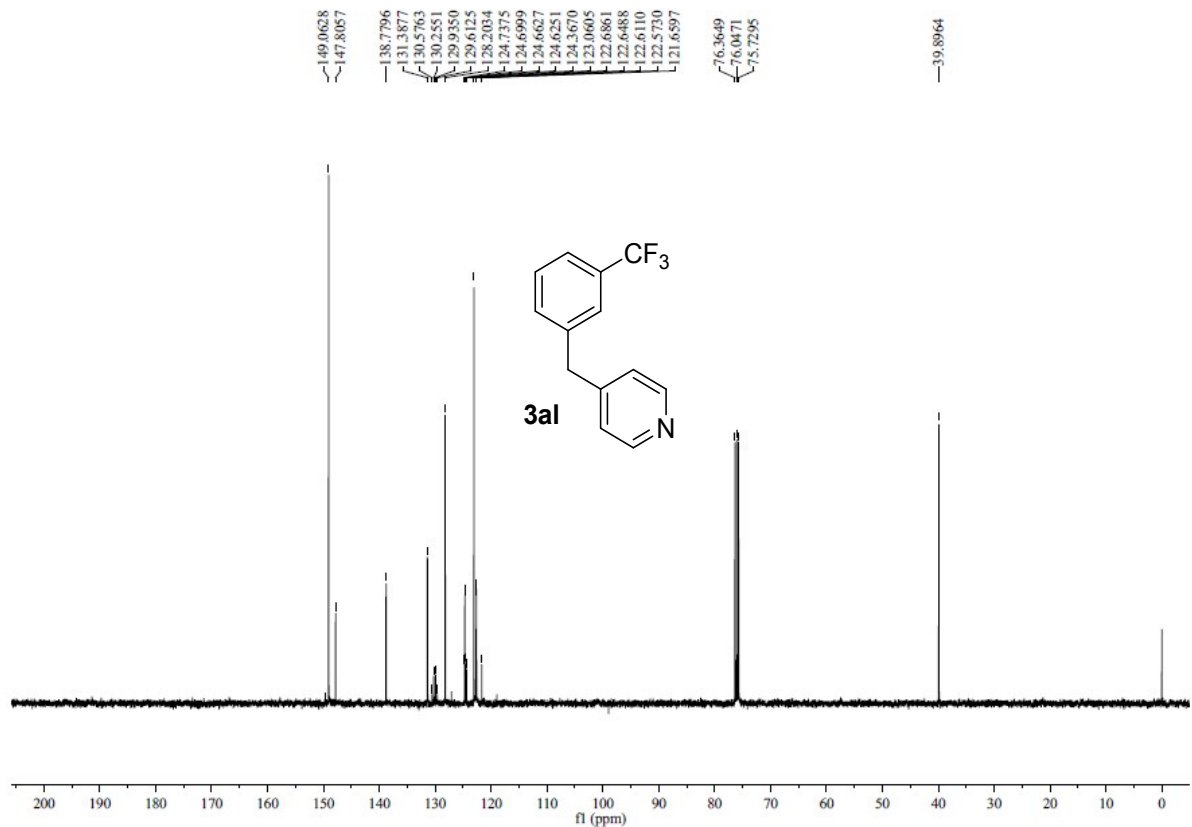

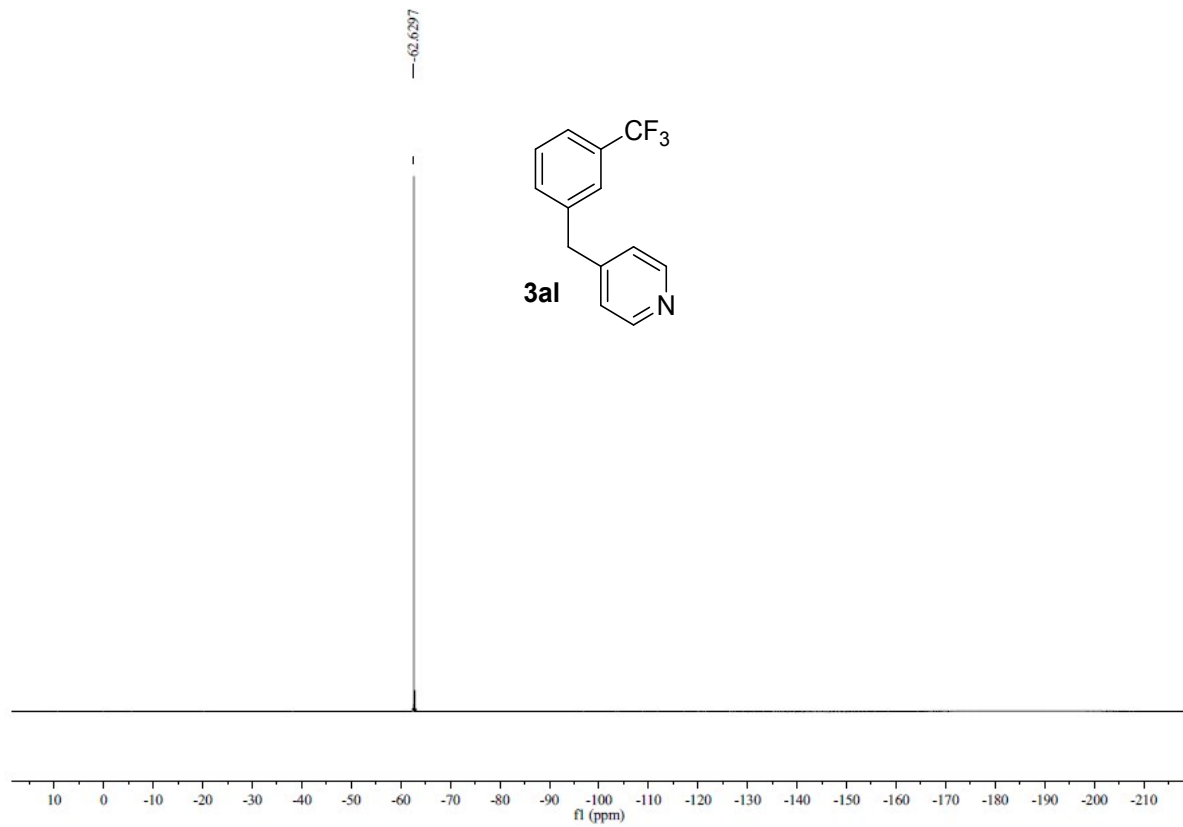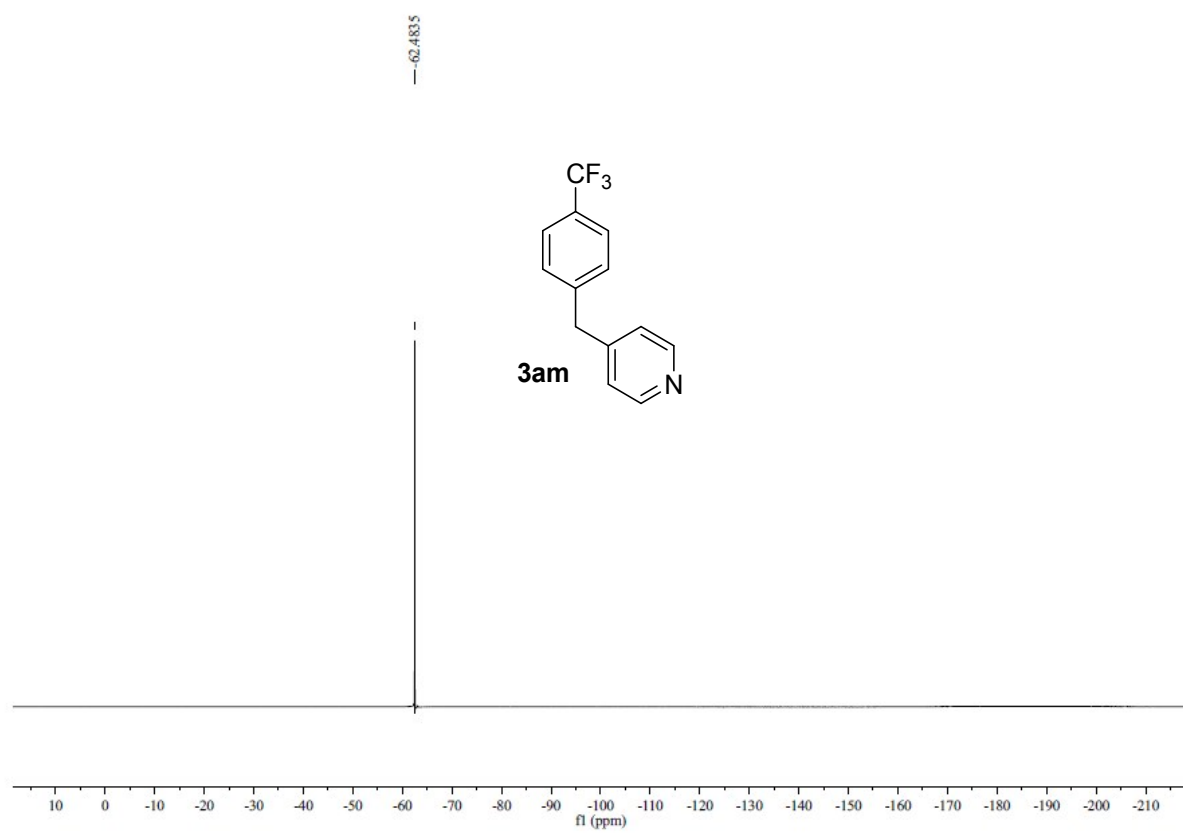

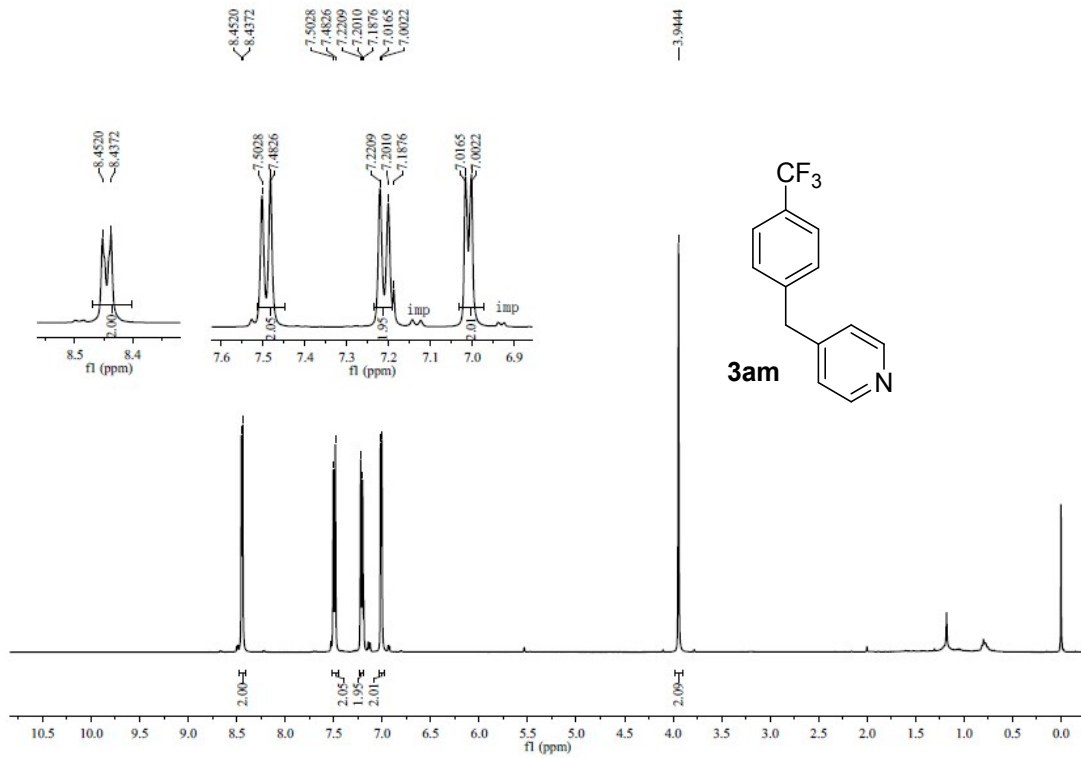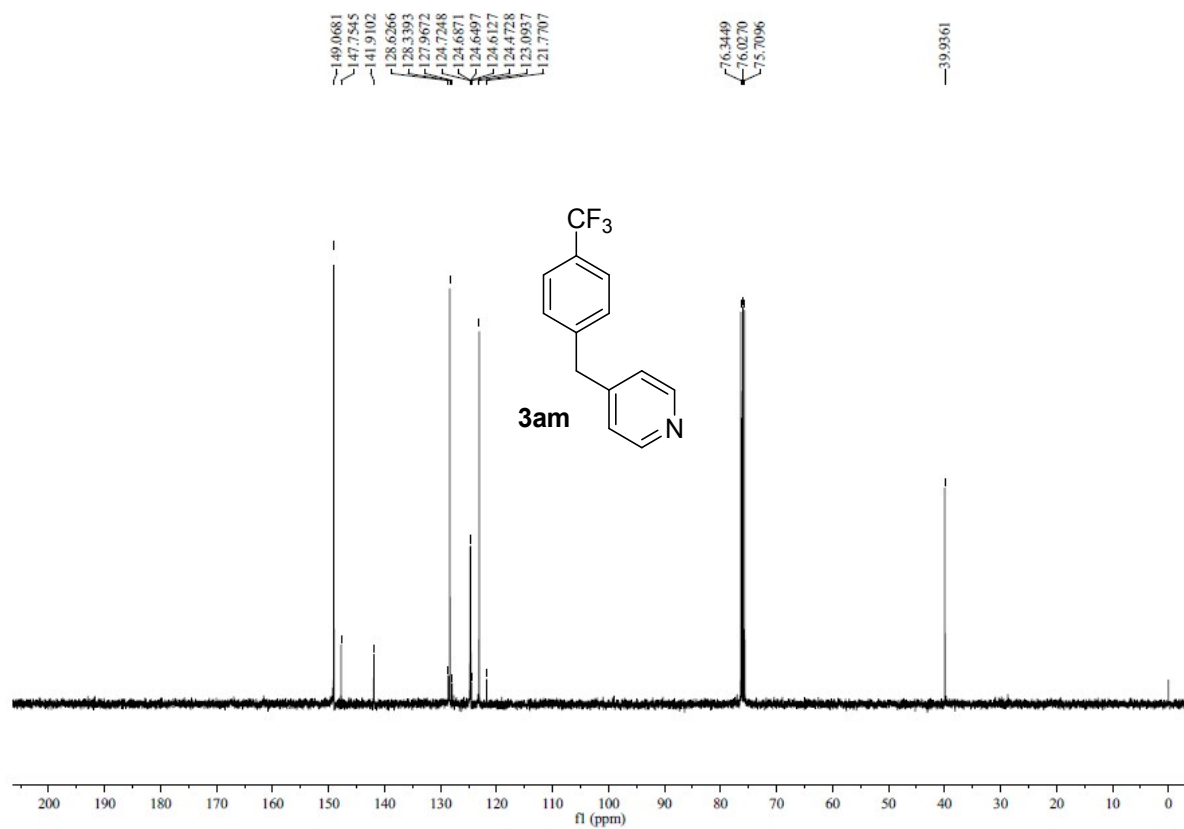

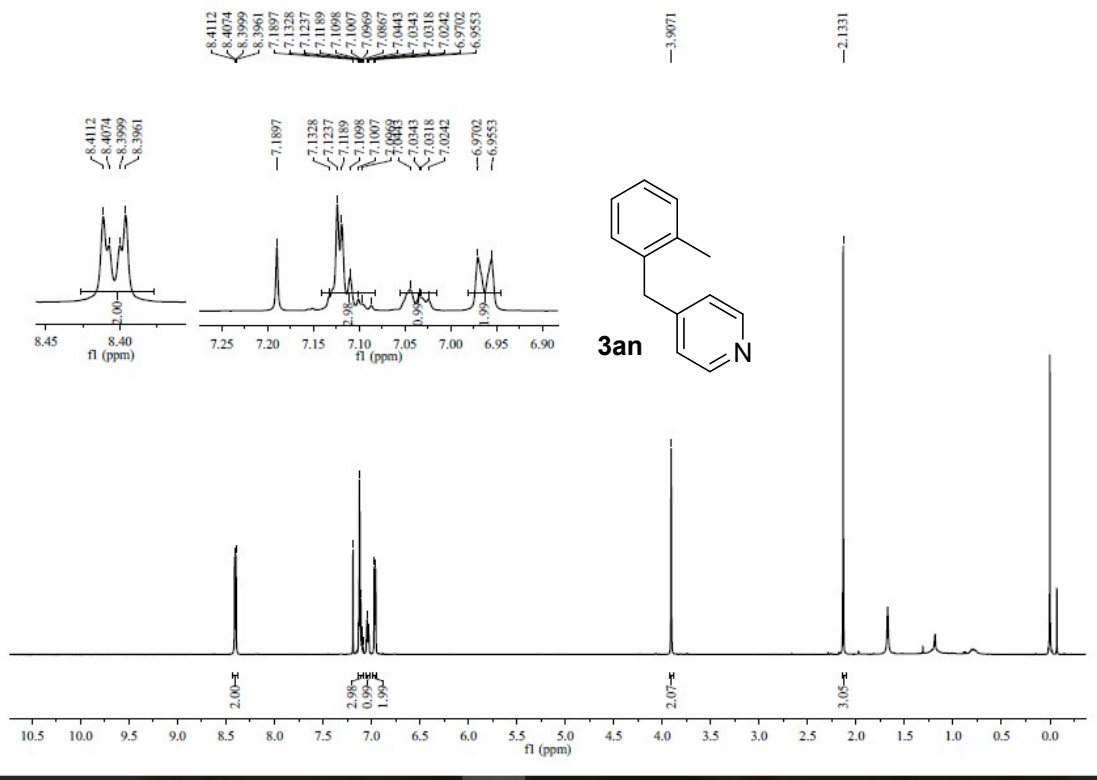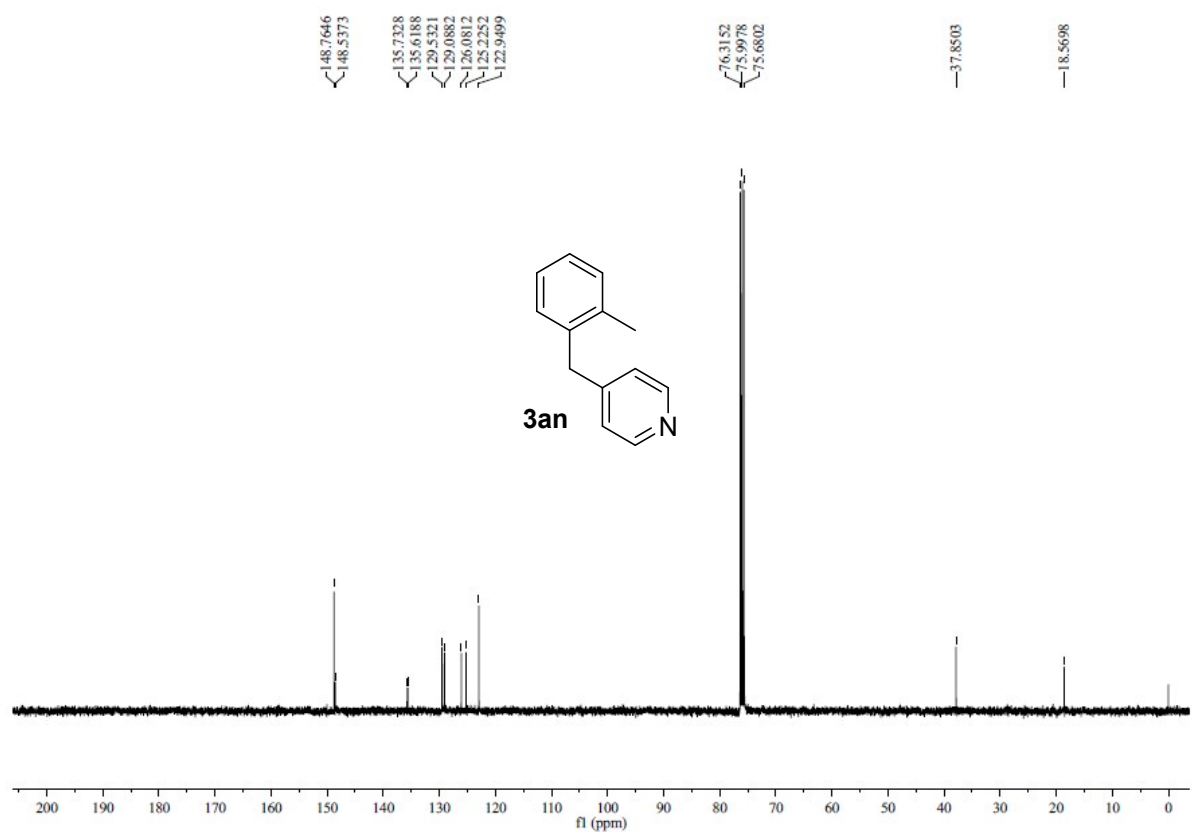

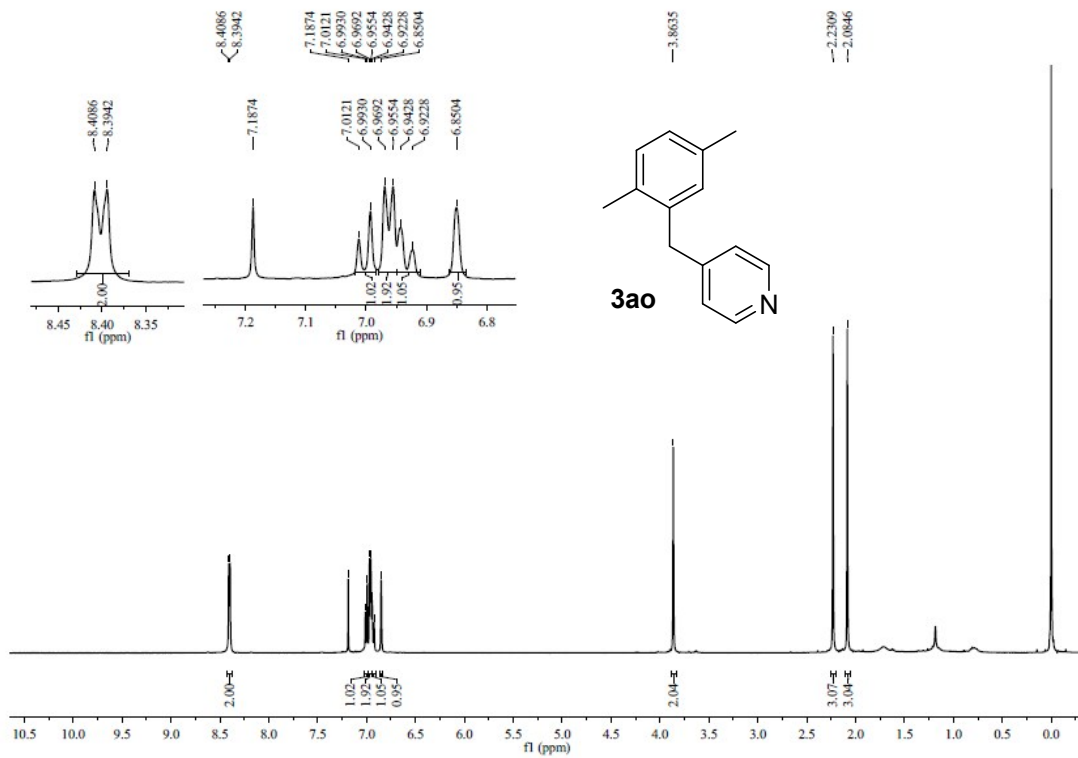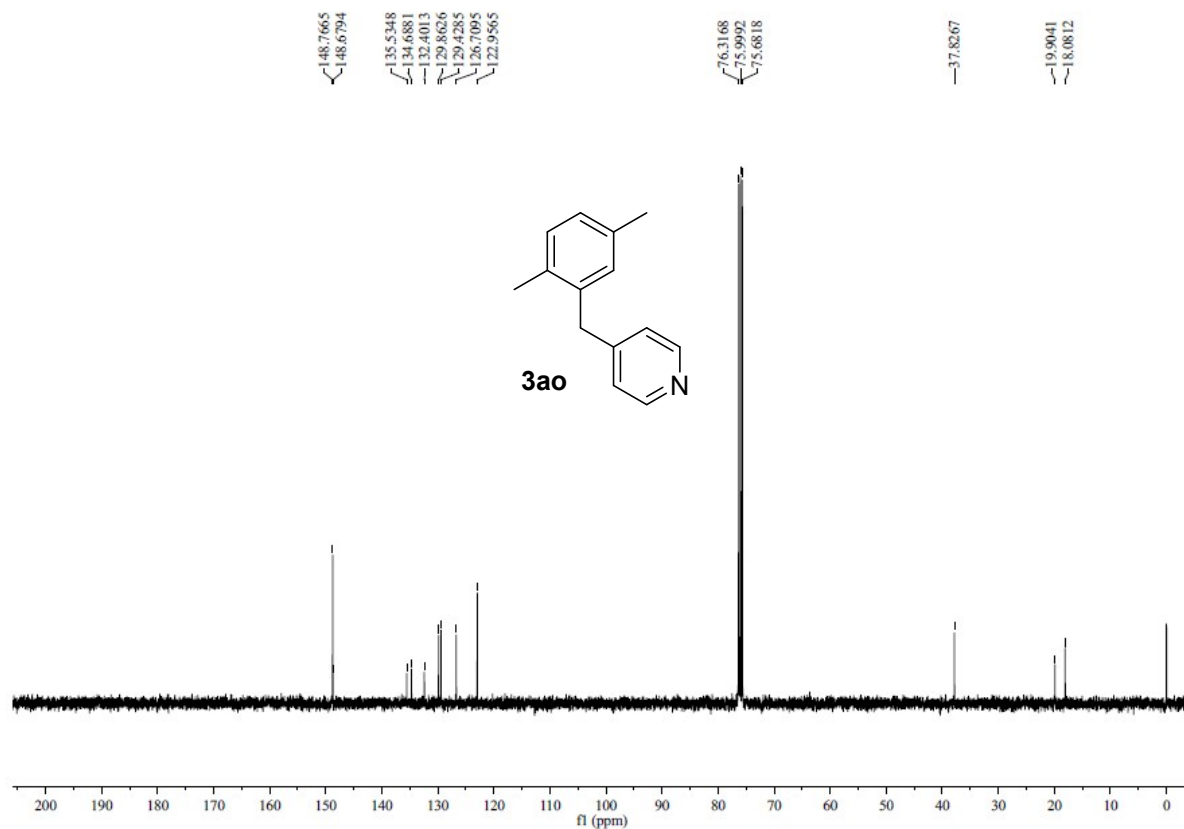

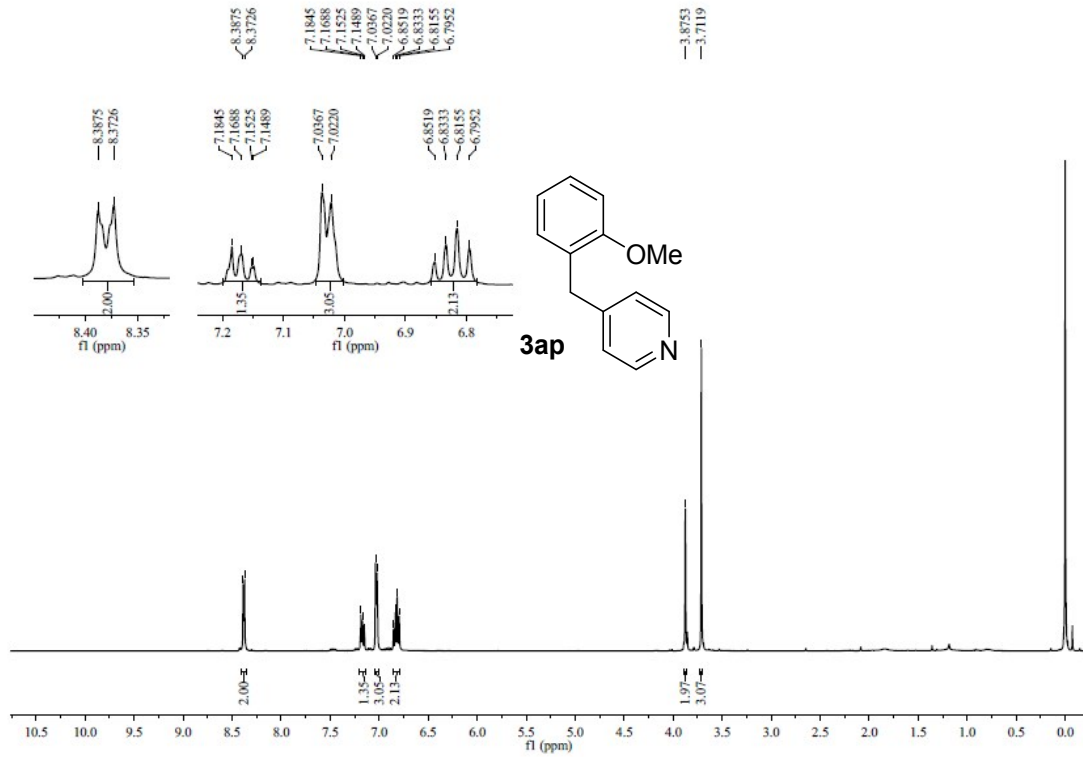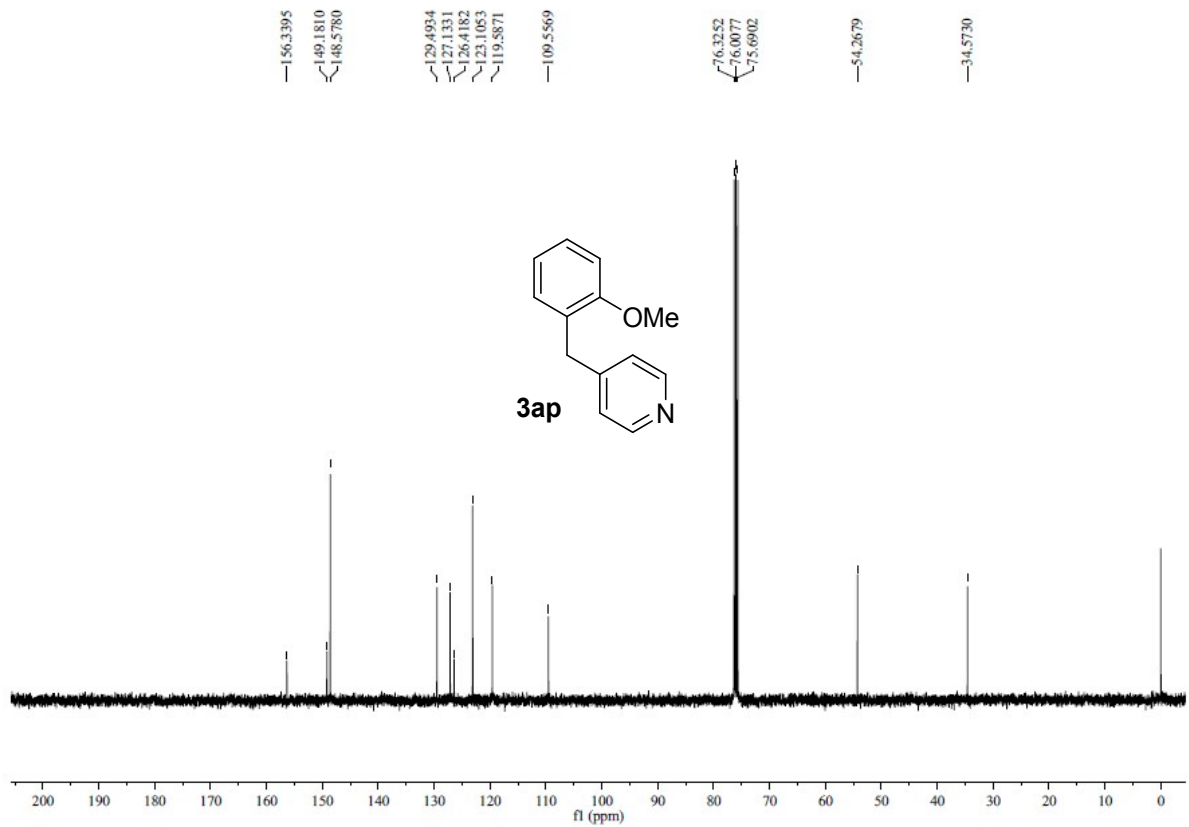



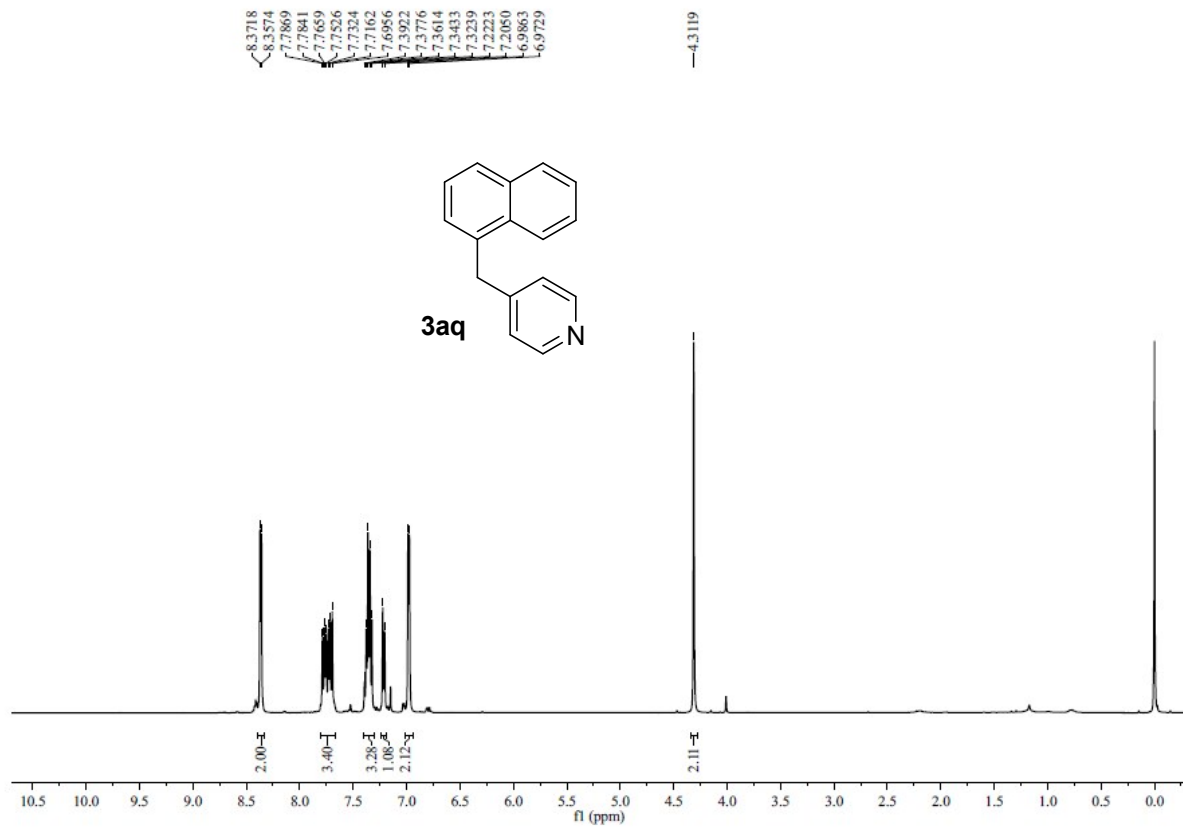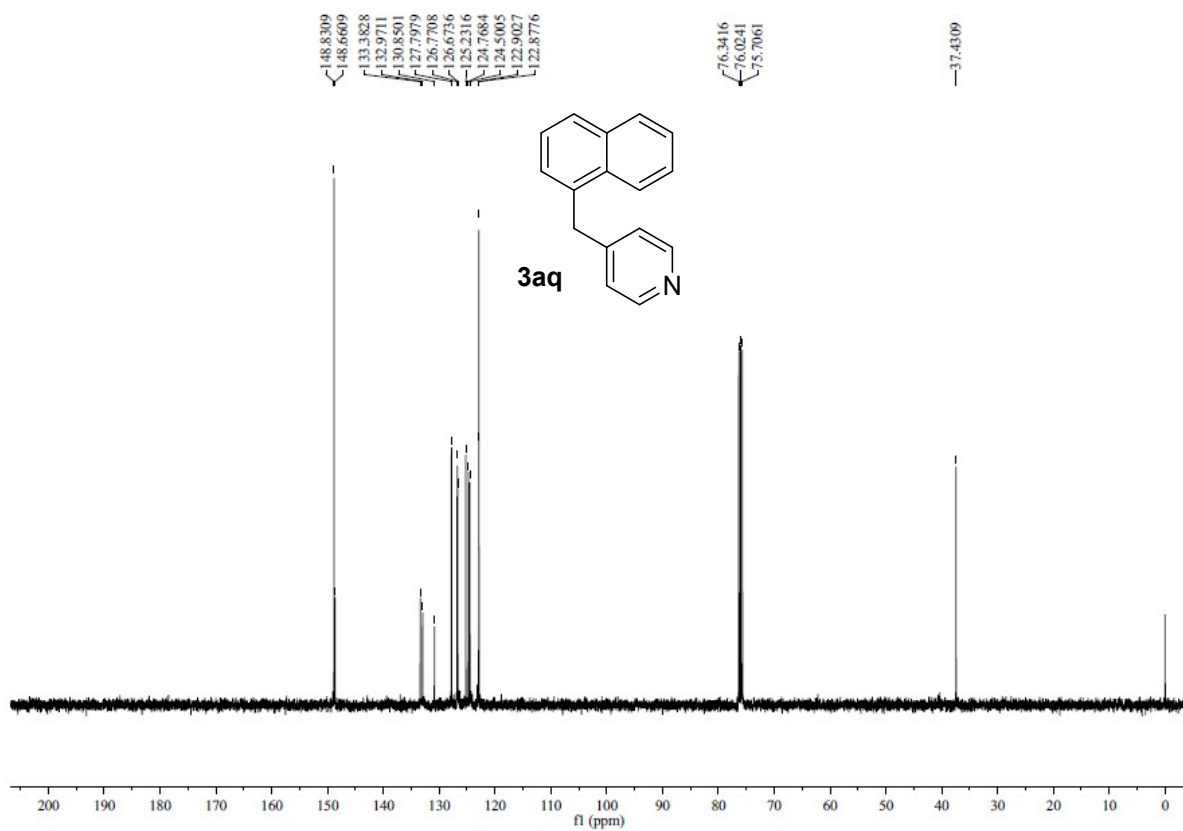

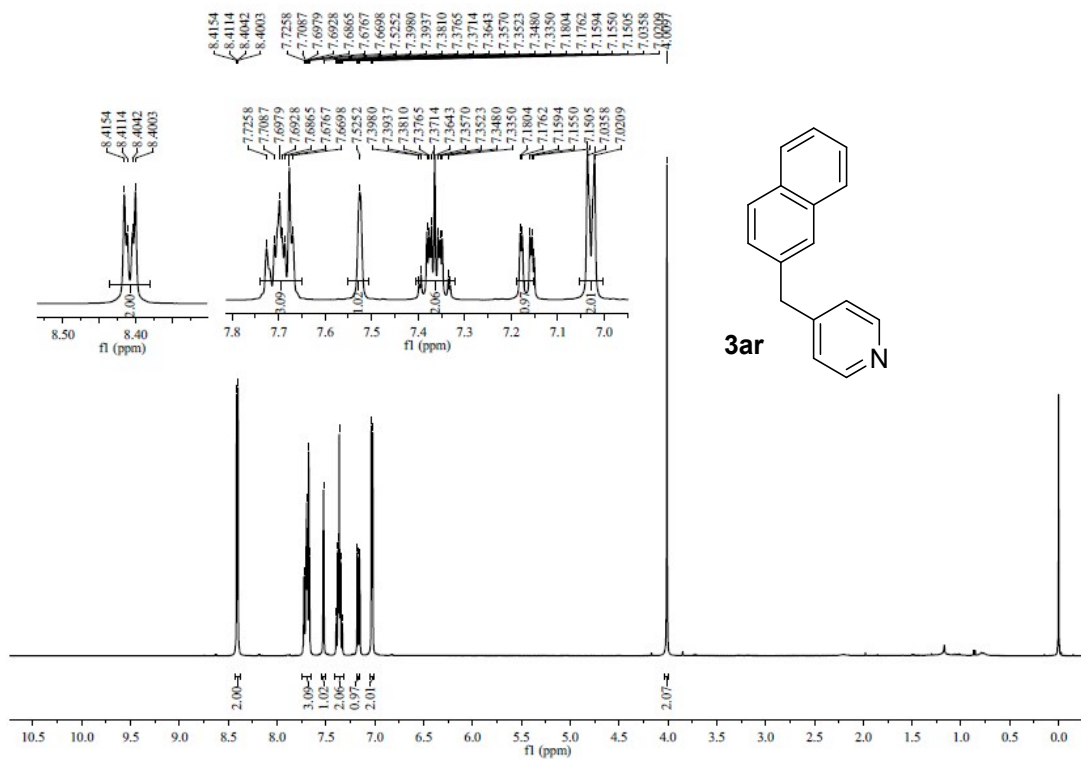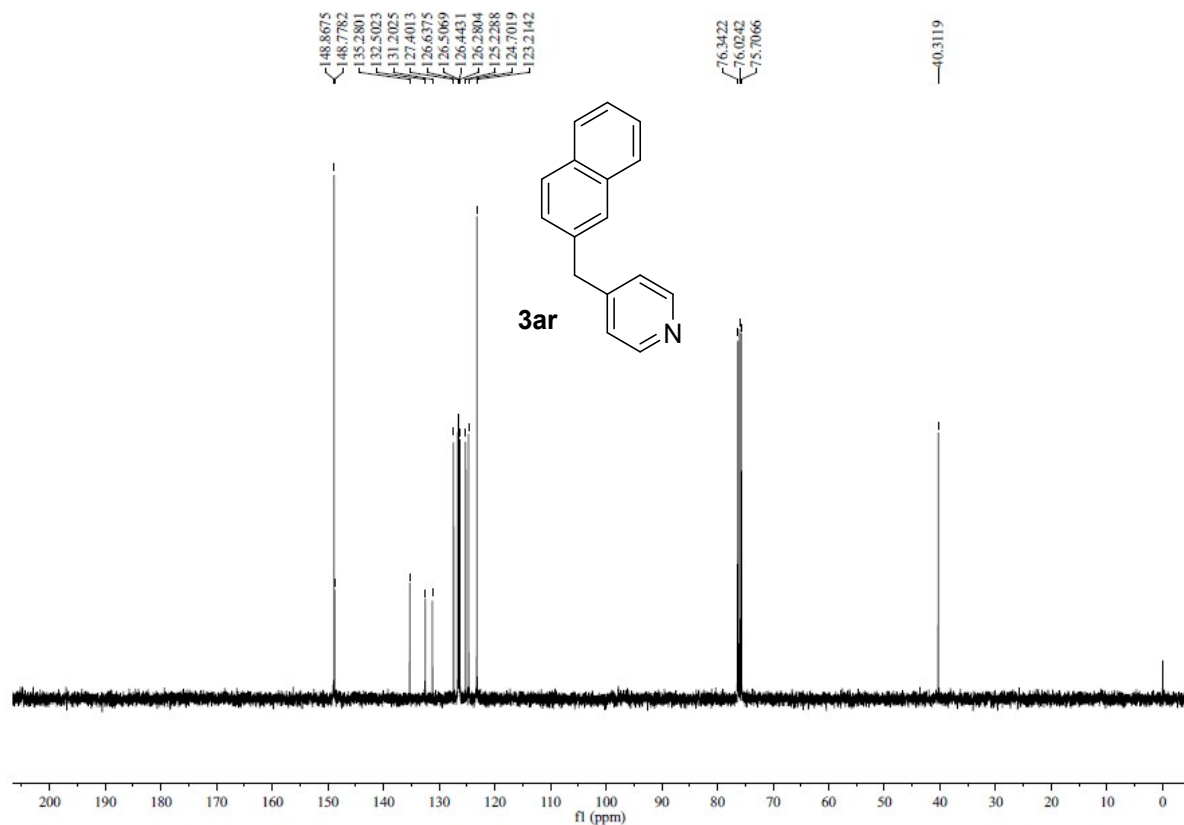

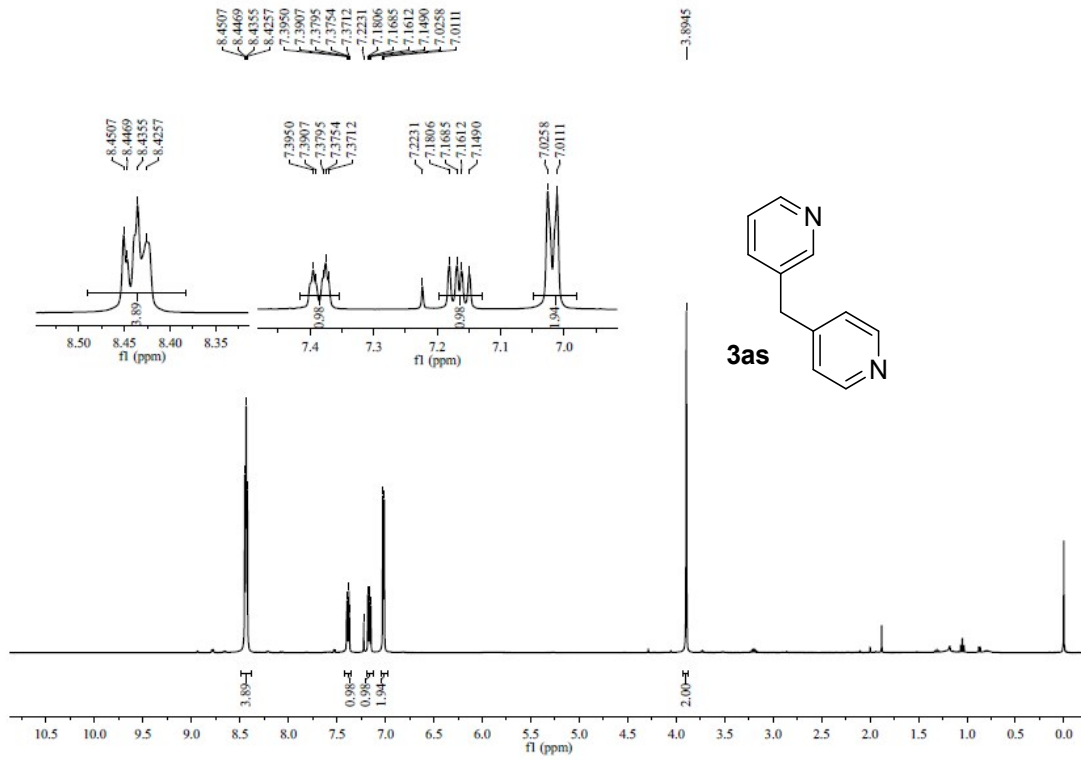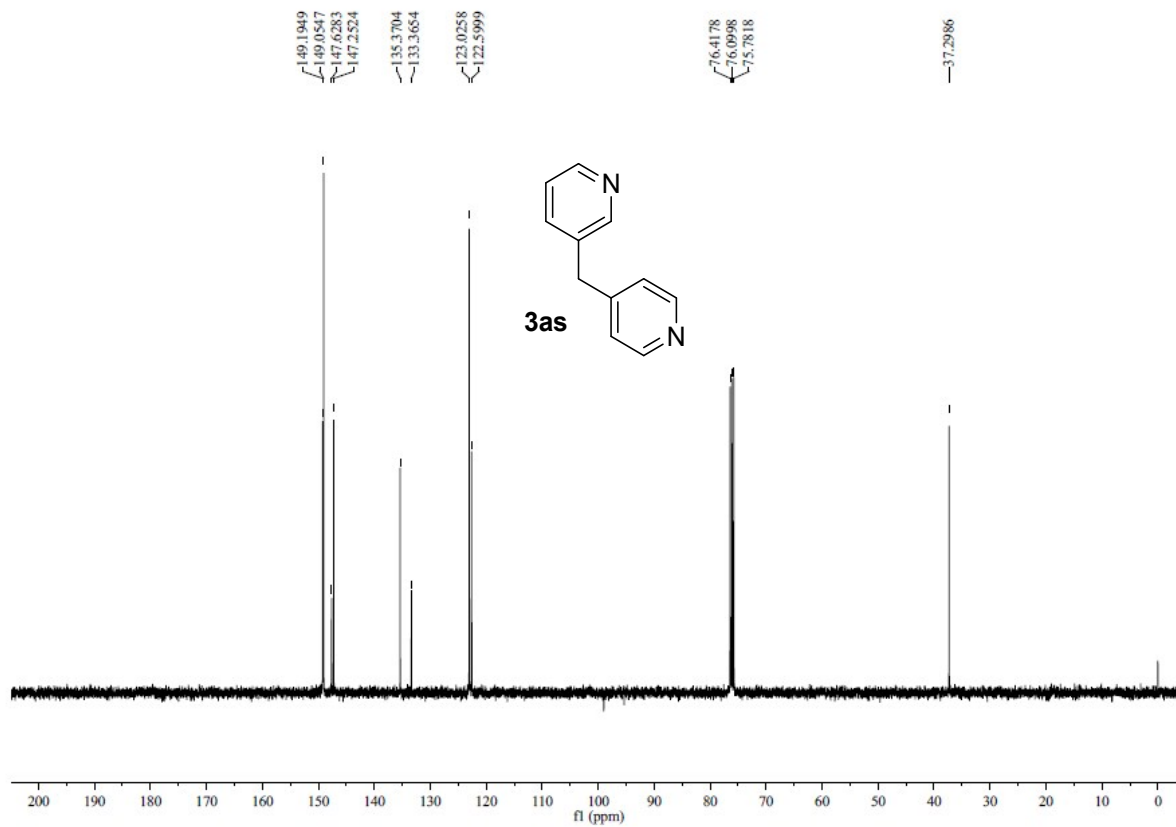

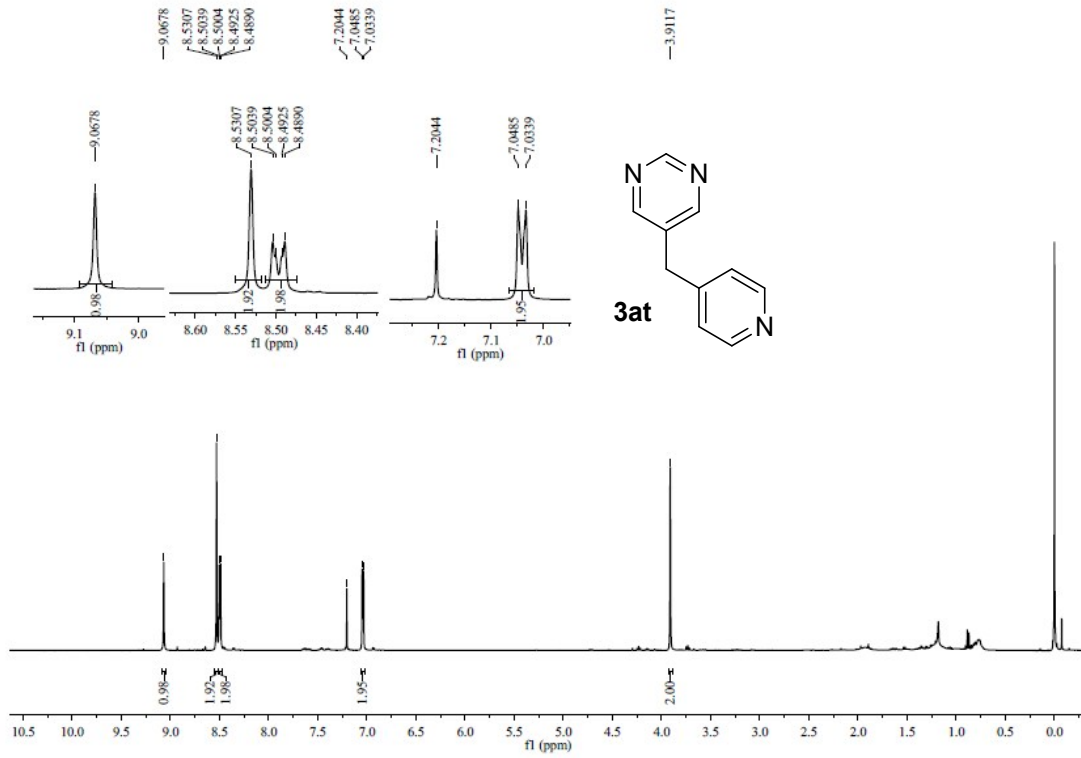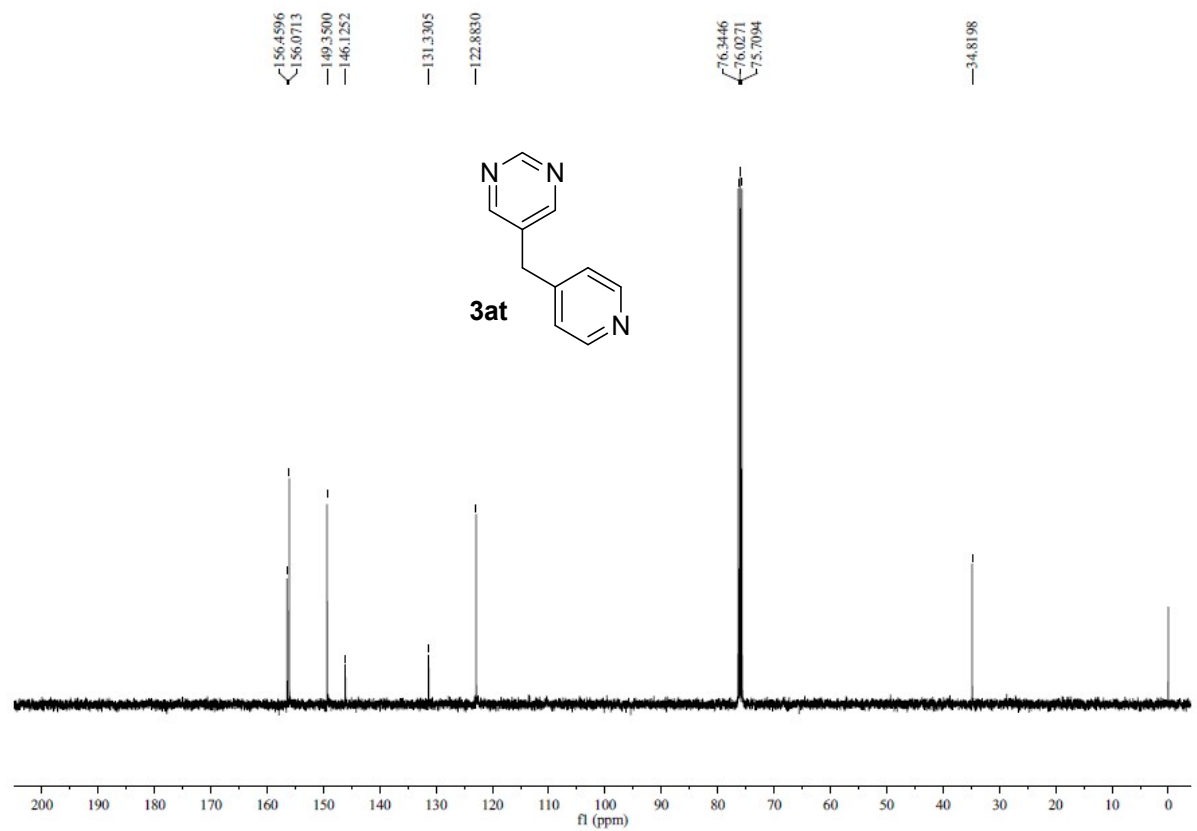

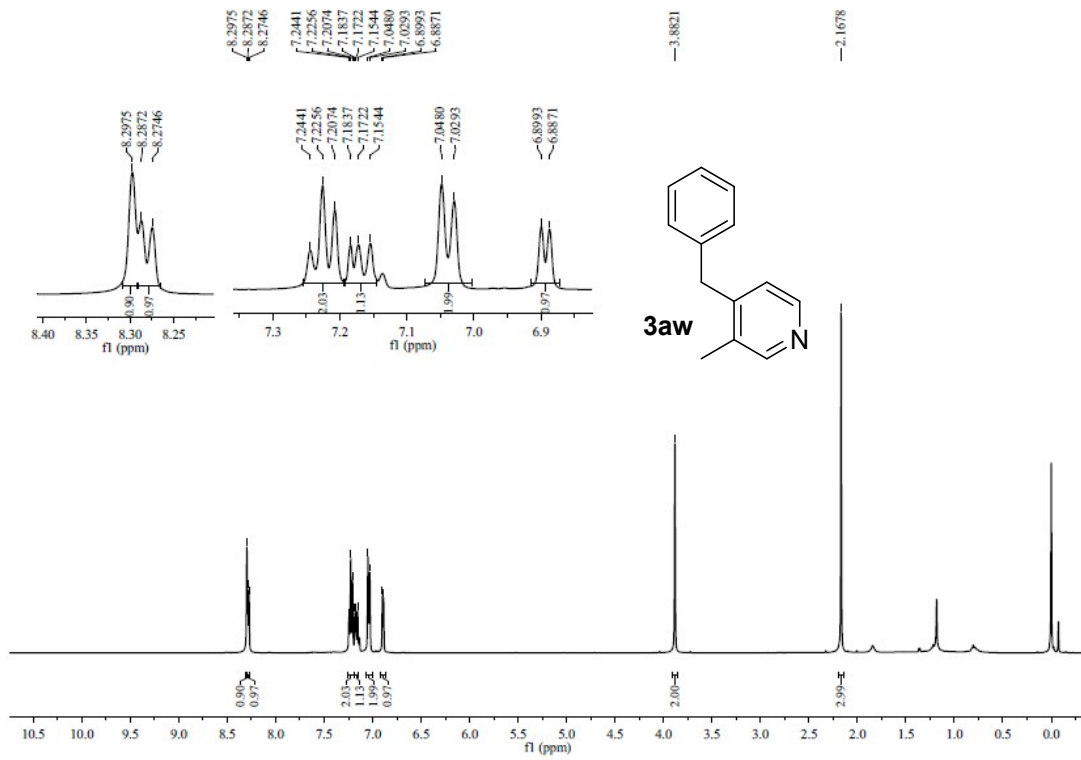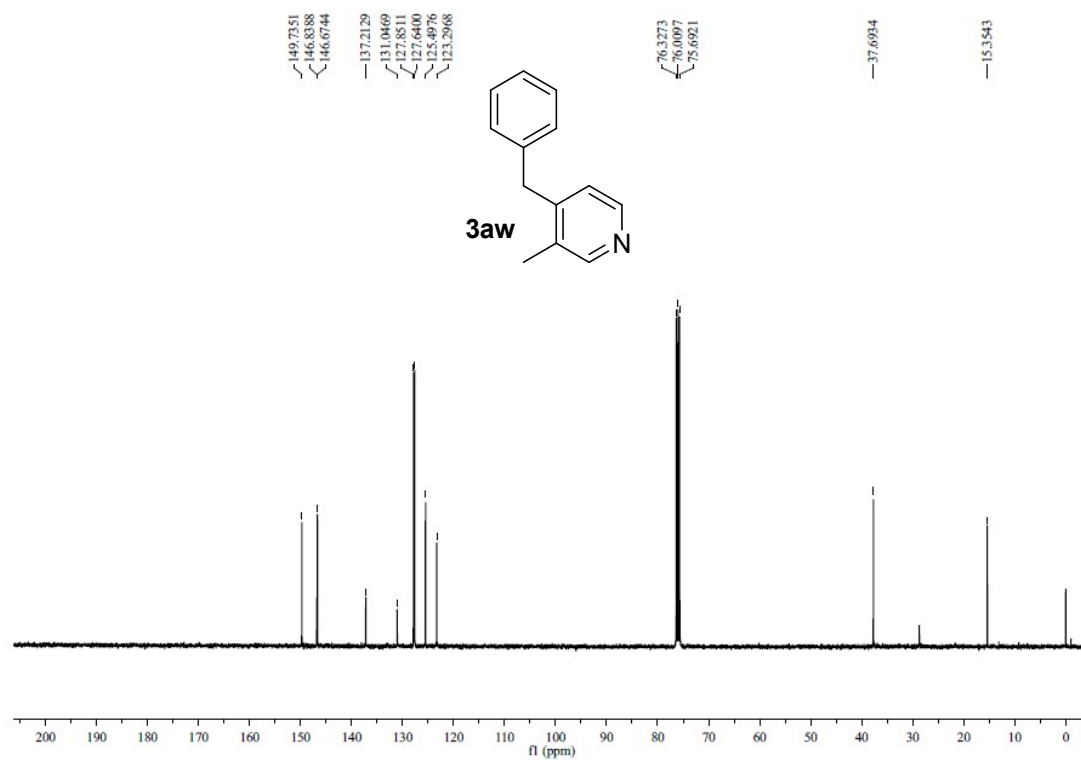

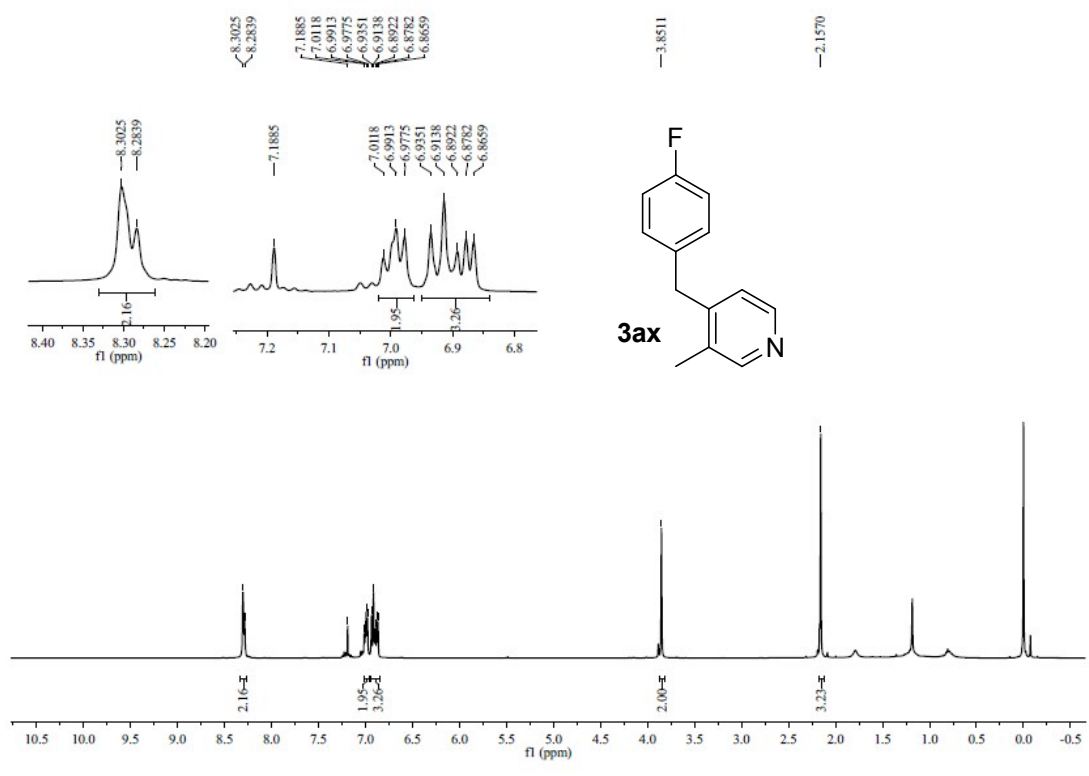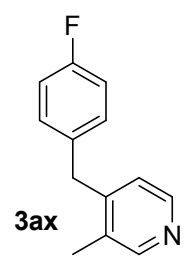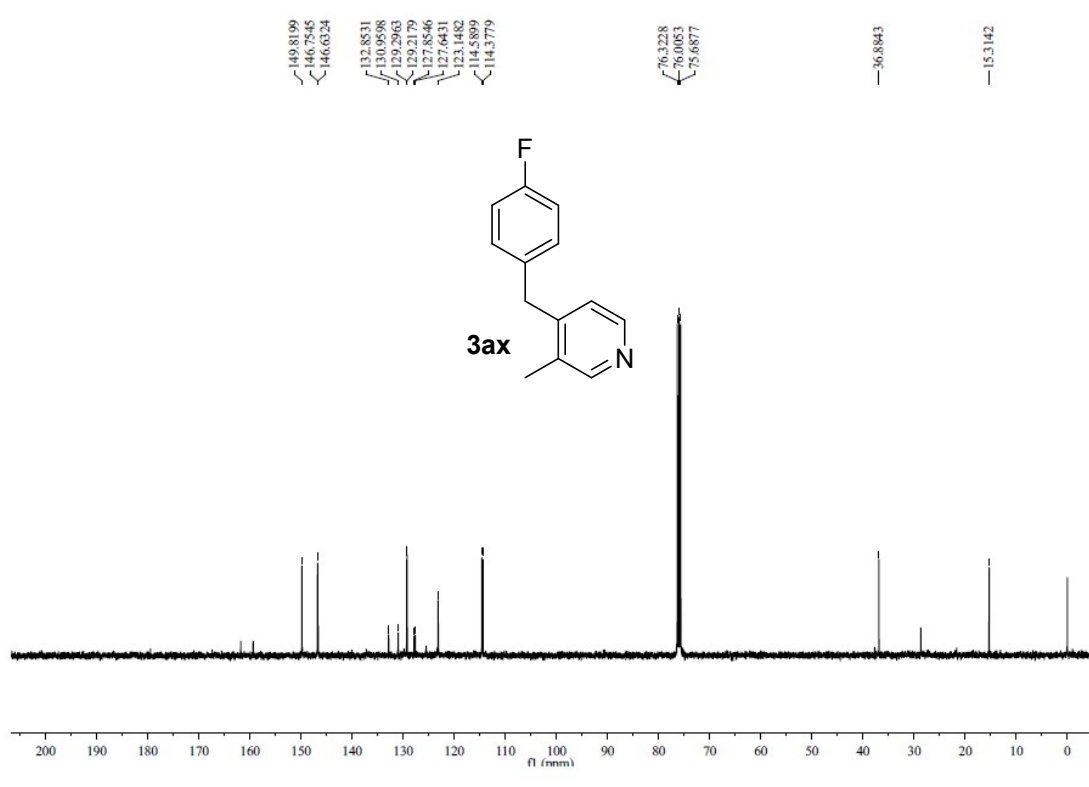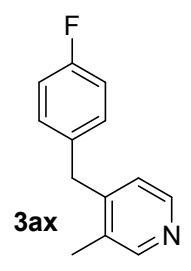

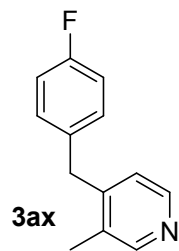

-116.4322

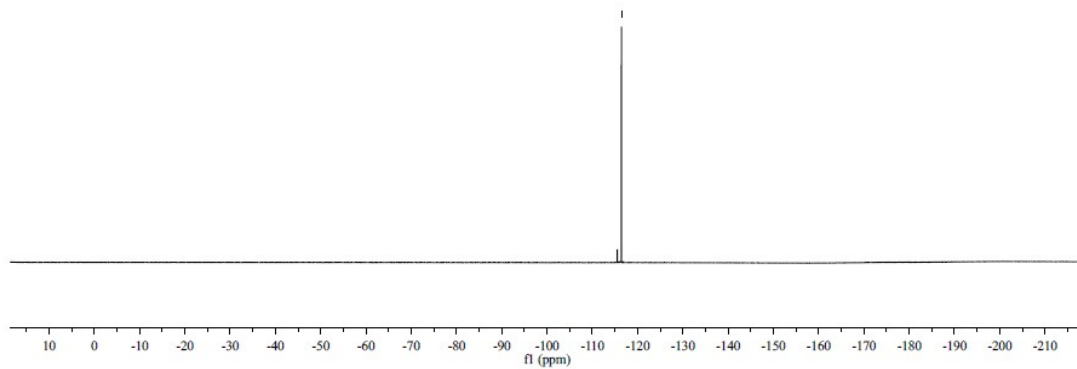

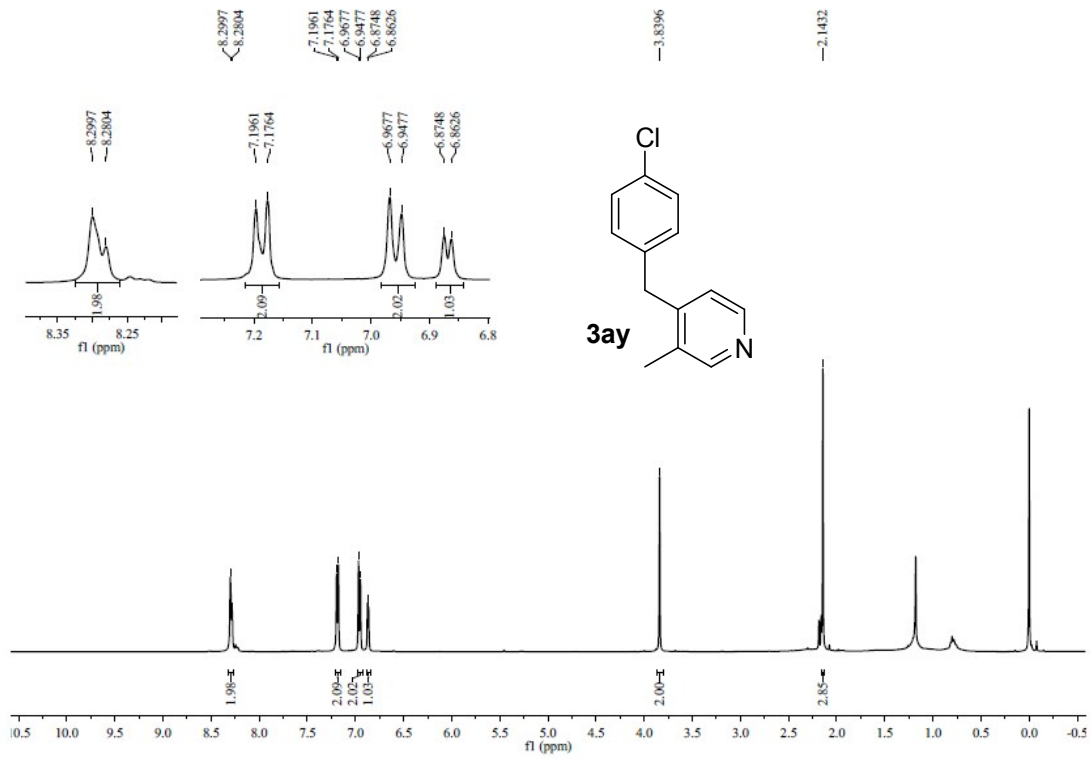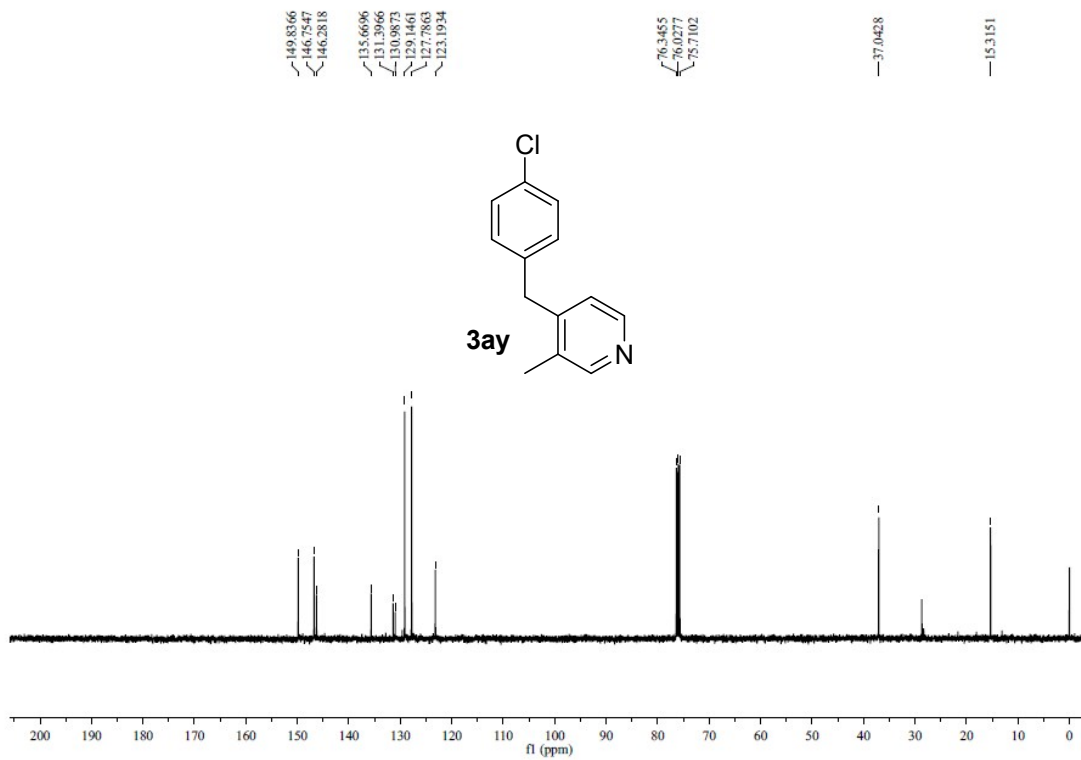

Supplement: c7ob01726j1.pdf [file c7ob01726j1.pdf]
